# Supplementary material for: Understanding ethnic inequalities in stillbirth rates: a UK population-based cohort study
Source: PubMed Central journal article supplement — BMJ Open. 2022 Jan 24;12(2):e057412. doi: 10.1136/bmjopen-2021-057412 (PMC8968514; doi:10.1136/bmjopen-2021-057412), 2022-01-24
Supplement: bmjopen-2021-057412.draft_revisions.pdf [file bmjopen-2021-057412.draft_revisions.pdf]

# BMJ Open

BMJ Open is committed to open peer review. As part of this commitment we make the peer review history of every article we publish publicly available.

When an article is published we post the peer reviewers' comments and the authors' responses online. We also post the versions of the paper that were used during peer review. These are the versions that the peer review comments apply to.

The versions of the paper that follow are the versions that were submitted during the peer review process. They are not the versions of record or the final published versions. They should not be cited or distributed as the published version of this manuscript.

BMJ Open is an open access journal and the full, final, typeset and author-corrected version of record of the manuscript is available on our site with no access controls, subscription charges or pay-per-view fees (<http://bmjopen.bmj.com>).

If you have any questions on BMJ Open's open peer review process please email [info.bmjopen@bmj.com](mailto:info.bmjopen@bmj.com)

# BMJ Open

## Understanding ethnic inequalities in stillbirth rates: A UK population based cohort study

|                               |                                                                                                                                                                                                                                                                                                                                                                                                                                                                                                                                                                                                                                                                                                                                                                                 |
|-------------------------------|---------------------------------------------------------------------------------------------------------------------------------------------------------------------------------------------------------------------------------------------------------------------------------------------------------------------------------------------------------------------------------------------------------------------------------------------------------------------------------------------------------------------------------------------------------------------------------------------------------------------------------------------------------------------------------------------------------------------------------------------------------------------------------|
| Journal:                      | <i>BMJ Open</i>                                                                                                                                                                                                                                                                                                                                                                                                                                                                                                                                                                                                                                                                                                                                                                 |
| Manuscript ID                 | bmjopen-2021-057412                                                                                                                                                                                                                                                                                                                                                                                                                                                                                                                                                                                                                                                                                                                                                             |
| Article Type:                 | Original research                                                                                                                                                                                                                                                                                                                                                                                                                                                                                                                                                                                                                                                                                                                                                               |
| Date Submitted by the Author: | 16-Sep-2021                                                                                                                                                                                                                                                                                                                                                                                                                                                                                                                                                                                                                                                                                                                                                                     |
| Complete List of Authors:     | <p>Matthews, Ruth; University of Leicester College of Life Sciences, Department of Health Sciences</p> <p>Draper, Elizabeth; University of Leicester College of Life Sciences, Department of Health Sciences</p> <p>Manktelow, Bradley; University of Leicester College of Life Sciences, Department of Health Sciences</p> <p>Kurinczuk, Jennifer; University of Oxford, National Perinatal Epidemiology Unit</p> <p>Fenton, Alan; Royal Victoria Infirmary, Newcastle Neonatal Service</p> <p>Dunkley-Bent, Jacqueline; NHS England and NHS Improvement London</p> <p>Gallimore, Ian; University of Leicester College of Life Sciences, Department of Health Sciences</p> <p>Smith, Lucy; University of Leicester College of Life Sciences, Department of Health Sciences</p> |
| Keywords:                     | OBSTETRICS, EPIDEMIOLOGY, PUBLIC HEALTH                                                                                                                                                                                                                                                                                                                                                                                                                                                                                                                                                                                                                                                                                                                                         |
|                               |                                                                                                                                                                                                                                                                                                                                                                                                                                                                                                                                                                                                                                                                                                                                                                                 |

SCHOLARONE™  
Manuscripts

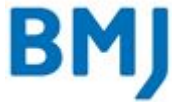

I, the Submitting Author has the right to grant and does grant on behalf of all authors of the Work (as defined in the below author licence), an exclusive licence and/or a non-exclusive licence for contributions from authors who are: i) UK Crown employees; ii) where BMJ has agreed a CC-BY licence shall apply, and/or iii) in accordance with the terms applicable for US Federal Government officers or employees acting as part of their official duties; on a worldwide, perpetual, irrevocable, royalty-free basis to BMJ Publishing Group Ltd ("BMJ") its licensees and where the relevant Journal is co-owned by BMJ to the co-owners of the Journal, to publish the Work in this journal and any other BMJ products and to exploit all rights, as set out in our [licence](#).

The Submitting Author accepts and understands that any supply made under these terms is made by BMJ to the Submitting Author unless you are acting as an employee on behalf of your employer or a postgraduate student of an affiliated institution which is paying any applicable article publishing charge ("APC") for Open Access articles. Where the Submitting Author wishes to make the Work available on an Open Access basis (and intends to pay the relevant APC), the terms of reuse of such Open Access shall be governed by a Creative Commons licence – details of these licences and which [Creative Commons](#) licence will apply to this Work are set out in our licence referred to above.

Other than as permitted in any relevant BMJ Author's Self Archiving Policies, I confirm this Work has not been accepted for publication elsewhere, is not being considered for publication elsewhere and does not duplicate material already published. I confirm all authors consent to publication of this Work and authorise the granting of this licence.

1  
2  
3 **Understanding ethnic inequalities in stillbirth rates: A UK population based**  
4  
5  
6 **cohort study**  
7  
8

9 Ruth J Matthews, Elizabeth S Draper, Bradley N Manktelow, Jennifer Kurinczuk, Alan Fenton,  
10  
11  
12 Jacqueline Dunkley-Bent, Ian Gallimore, Lucy K Smith on behalf of the MBRRACE-UK

13  
14 Collaboration  
15

16  
17 Corresponding author: Ruth J Matthews, PhD Student, Department of Health Sciences, College of  
18  
19 Life Sciences, George Davies Centre, University of Leicester, University Road, Leicester, LE1 7RH, UK  
20  
21 [rjm88@le.ac.uk](mailto:rjm88@le.ac.uk)  
22  
23

24  
25 Elizabeth S Draper, Professor of Perinatal and Paediatric Epidemiology, Department of Health  
26  
27 Sciences, College of Life Sciences, University of Leicester, Leicester, UK  
28

29  
30 Bradley N Manktelow, Professor of Medical Statistics, Department of Health Sciences, College of Life  
31  
32 Sciences, University of Leicester, Leicester, UK  
33

34  
35 Jennifer Kurinczuk, Professor of Perinatal Epidemiology, National Perinatal Epidemiology Unit,  
36  
37 Nuffield Department of Population Health, University of Oxford, UK  
38

39  
40 Alan C Fenton, Consultant Neonatal Paediatrician, Newcastle Neonatal Service, Royal Victoria  
41  
42 Infirmary, Newcastle Upon Tyne, UK  
43  
44

45  
46 Jacqueline Dunkley-Bent, Professor of Midwifery, Chief Midwifery Officer, National Maternity Safety  
47  
48 Champion, NHS England and NHS Improvement, London, UK  
49

50  
51 Ian Gallimore, MBRRACE-UK Project Team Leader, Department of Health Sciences, College of Life  
52  
53 Sciences, University of Leicester, Leicester, UK  
54

55  
56 Lucy K Smith, Professor of Perinatal Health, Department of Health Sciences, College of Life Sciences,  
57  
58 University of Leicester, UK  
59  
60

1  
2  
3 Word count: 3,124  
4  
5

6 **Abstract**  
7

8  
9 **Objectives** – Stillbirth rates in the UK are higher and reducing at a slower rate than comparable high-  
10 income countries. We investigate inequalities in stillbirth rates by ethnicity to facilitate development  
11 of initiatives to target those at highest risk.  
12  
13  
14

15  
16 **Design** – Population-based cohort study  
17

18  
19 **Setting** - UK  
20  
21

22 **Participants** – All singleton births at 24+ weeks gestation between 2014 and 2019  
23  
24

25 **Main outcome measures** – Stillbirth rate difference per 1,000 total births by ethnicity.  
26  
27

28 **Results** – Adjusted absolute differences in stillbirth rates were higher for babies of Black African  
29 (3.83, 95%CI: 3.35 to 4.32), Black Caribbean (3.60, 2.65 to 4.55) and Pakistani (2.99, 2.58 to 3.40)  
30 ethnicities compared with White ethnicities. Higher proportions of babies of Bangladeshi (42%),  
31 Black African (39%), Black Caribbean (37%) and Pakistani (28%) ethnicities were from most deprived  
32 areas, which are associated with an additional risk of 1.50 stillbirths per 1,000 births (95%CI 1.32 to  
33 1.67) . Higher stillbirth rates were associated with congenital anomalies in babies of Pakistani,  
34 Bangladeshi and Black African ethnicities (0.63 to 1.05 per 1,000 births) and placental causes in Black  
35 ethnicities (1.97 to 2.24 per 1,000 births). Stillbirth rates of unexplained cause were higher for Black  
36 and Asian ethnicities (2.24 to 2.99 per 1,000 births), with over half of stillbirths recorded  
37 unexplained for babies of other Asian (60.2%), Bangladeshi (57.9%), and Indian (51.5%) ethnicities.  
38  
39  
40  
41  
42  
43  
44  
45  
46  
47  
48  
49

50  
51 **Conclusions** - Stillbirth rates declined in the UK, but substantial excess risk of stillbirth persist among  
52 babies of Black and Asian ethnicities. The combined disadvantage for Black, Pakistani, and  
53 Bangladeshi ethnicities who are more likely to live in most deprived areas is associated with  
54 considerably higher rates. Key causes of death were congenital anomalies and placental causes.  
55  
56  
57  
58  
59  
60

1  
2  
3 Improved strategies for investigation of stillbirth causes are needed to reduce unexplained deaths so  
4  
5 that interventions can be targeted to reduce stillbirths.  
6  
7  
8  
9

## 10 **Article Summary**

### 11 12 **Strengths and limitations of this study**

- 13 • National data with complete ascertainment of all stillbirths over a 6 year period from 2014-  
14  
15 2019
- 16 • Inclusion of over 4 million births and over 16,000 stillbirths, which allows exploration of  
17  
18 ethnicity with greater granularity.
- 19 • Information on cause of death allowing further understanding of inequalities in stillbirth  
20  
21 rates.
- 22 • Despite reporting adjusted estimates, we cannot rule out residual confounding by  
23  
24 potentially important modifiable risk factors not measured for all births.
- 25 • Ethnicity from birth notifications is in principle self-defined, but in reality may sometimes be  
26  
27 assigned by health professionals and subject to misclassification.  
28  
29  
30  
31  
32  
33  
34  
35  
36  
37  
38  
39  
40  
41

### 42 **Key words**

43  
44  
45 Stillbirth, ethnic inequalities, perinatal mortality, mortality rates, cause of death  
46  
47  
48  
49  
50  
51  
52  
53  
54  
55  
56  
57  
58  
59  
60

## Introduction

The worldwide Covid-19 pandemic has highlighted the unacceptable health inequalities experienced by individuals from different ethnic groups, and the issue is receiving the global attention it has long deserved. In the UK, reports highlighting ethnic inequalities in maternal mortality<sup>1</sup> have also assisted in propelling this issue into the limelight, and sparked the Fivexmore campaign to change Black women's maternal health outcomes (<https://www.fivexmore.com>). Stillbirths are a major health burden with large disparity between and, importantly, within countries.<sup>2-4</sup> Ethnic inequalities in stillbirth rates have been noted in a number of high-income countries including Australia,<sup>5</sup> New Zealand,<sup>6</sup> North America,<sup>7</sup> and Europe<sup>8-9</sup> with rates often over double for migrant mothers or minority ethnic groups compared with those of White ethnicity. Recent national stillbirth data for the UK<sup>10</sup> and England and Wales<sup>11</sup> similarly report stillbirth rates to be around twice as high in babies of Black ethnicity and 60% higher in babies of Asian ethnicity compared to babies of White ethnicity. Research into ethnic inequalities in stillbirth rates is limited, and little is known about differences in the causes of stillbirth between ethnic groups, with a lack of detailed information on cause of death in studies that have explored associations.<sup>7-11</sup> Minority ethnic groups in the UK are typically more socioeconomically disadvantaged and likely to have poorer health outcomes than the White population<sup>11-12</sup> and may have different age profiles because of migration patterns or cultural differences in timing of motherhood. It is therefore important to consider the impact these factors have on the association between ethnicity and stillbirth.<sup>13-14</sup>

Stillbirth rates are higher in the United Kingdom (UK) than many other comparable high-income countries, and are decreasing more slowly.<sup>2-15</sup> Despite targets set by the Governments across the UK to reduce stillbirths by between 35 and 50%<sup>16-18</sup> alongside a number of initiatives aimed at improving maternity services and care<sup>19-23</sup> improvements remain gradual. Here we explore recent trends in UK stillbirth rates by ethnicity, the extent to which associations between ethnicity and stillbirth are mediated by socioeconomic deprivation and maternal age, and whether cause of death varies

1  
2  
3 between ethnic groups. A greater impact on stillbirth rates may be achieved through better  
4 understanding of the multiple disadvantages that lead to higher risks of stillbirth<sup>2,24</sup> and the  
5 differences in the causes of death between ethnicities, so that initiatives can be targeted towards  
6 those most in need and reduce evident inequalities in stillbirth rates.  
7  
8  
9  
10  
11  
12  
13  
14  
15

## 16 **Methods**

17  
18 Data on all singleton live births and stillbirths from 24 weeks gestation to mothers resident in  
19 England, Wales, Scotland and Northern Ireland between 1 January 2014 and 31 December 2019  
20 were obtained from the Mothers and Babies: Reducing Risk through Audits and Confidential  
21 Enquiries across the UK (MBRRACE-UK) perinatal mortality surveillance programme<sup>10</sup> linked to birth  
22 notification and registration data. In January 2013, the Healthcare Quality Improvement Partnership  
23 commissioned the MBRRACE-UK collaboration to collect UK perinatal mortality surveillance data.  
24 MBRRACE-UK links detailed information on all deaths reported by UK hospitals with data on all births  
25 from the Patient Demographic Service (formerly the NN4B birth notification system) and birth and  
26 death registration data from the Office for National Statistics for England and Wales, National  
27 Records Scotland and Information Services Division for Scotland and the Northern Ireland Maternity  
28 System for Northern Ireland. MBRRACE-UK use stillbirth registrations from statutory notifications to  
29 ensure complete ascertainment of stillbirths.  
30  
31  
32  
33  
34  
35  
36  
37  
38  
39  
40  
41  
42  
43  
44  
45

46 Information about the baby's ethnicity is obtained via linkage with birth notification data for all  
47 births. Ethnic group available from birth notification data is that of the baby, as defined by the  
48 mother. We categorise baby's ethnicity as: White, Indian, Pakistani, Bangladeshi, other Asian, Black  
49 Caribbean, Black African and other Black, mixed ethnicities, and other (including Chinese). Minor  
50 variations in ethnicity classification between the four UK countries prevented reporting rates for  
51 more specific ethnicity groupings for babies of mixed ethnicity at the UK-level as well as for minority  
52  
53  
54  
55  
56  
57  
58  
59  
60



1  
2  
3 White ethnic groups. Where routine ethnicity data was missing for a stillborn baby, we used  
4  
5 ethnicity as recorded in MBRRACE-UK surveillance data.  
6  
7

8 We used the Children in Low-Income Families Local Measure<sup>25</sup> as an estimate of socioeconomic  
9  
10 deprivation. This is an area based measure of the proportion of children living in families that are  
11  
12 either in receipt of out-of-work benefits or in receipt of tax credits with a reported income that is  
13  
14 less than 60% of the national median income. We allocated this to mother's postcode of residence at  
15  
16 the time of birth through data linkage at the small area level. We ranked all areas in the United  
17  
18 Kingdom by deprivation score, dividing them into five groups with approximately equal numbers of  
19  
20 births in each quintile. Birth notification data were also used to provide information about maternal  
21  
22 age, which was grouped into five year age bands (<20 years, 20-24, 25-29, 30-34, 35-39 and 40+  
23  
24 years).  
25  
26  
27

28  
29 Stillbirths were classified based on timing of death as intrapartum if the baby was known to be alive  
30  
31 at the onset of the care episode which led to birth, and antepartum if the baby was not alive at  
32  
33 onset of care or if the timing of death was unknown (n=559). Cause of death was classified by  
34  
35 MBRRACE-UK reporters using the Cause of Death and Associated Conditions (CODAC) classification  
36  
37 system<sup>26</sup> into the following first level categories: Infection, Intrapartum, Congenital Anomaly, Fetal,  
38  
39 Cord Related, Placental Related, Maternal, or Unknown.  
40  
41  
42

#### 43 *Statistical Analysis*

44  
45

46 We calculated the stillbirth rate (per 1,000 total births) by ethnicity, deprivation quintile, maternal  
47  
48 age, country of residence at time of birth and year of birth. Binomial regression models with identity  
49  
50 link were fitted to explore the absolute difference in stillbirth rates between ethnic groups with  
51  
52 variance adjusted for clustering within small area (Lower super output area or data zone). All models  
53  
54 were adjusted for country of residence (England, Scotland, Wales and Northern Ireland) to allow for  
55  
56 differences in policy between the devolved nations that may influence stillbirth rates, and also year  
57  
58 of birth, to allow for differences in stillbirth rates over time. Multivariable models were fitted to  
59  
60

1  
2  
3 adjust additionally for socioeconomic deprivation and maternal age group, with deprivation quintile  
4 fitted as a continuous variable after assessment of linearity. Interactions were fitted between  
5  
6 ethnicity and deprivation quintile to explore whether the effect of deprivation was varied by  
7  
8 ethnicity. Trends in ethnic inequalities over time were explored by fitting interactions with year of  
9  
10 birth.  
11  
12  
13  
14

### 15 *Sensitivity analyses*

16  
17  
18 Multivariable models reported here are on a complete case basis, but repeating analyses including  
19  
20 individuals with missing data for covariates using an additional category for those with missing data  
21  
22 did not materially affect the results. Causes of death were examined before and after exclusion of  
23  
24 congenital anomalies, because of the association with access and choices surrounding termination of  
25  
26 pregnancy for fetal anomaly.  
27  
28  
29

30 The excess stillbirth rate associated with ethnicity was calculated by applying the stillbirth rate  
31  
32 observed for babies of White ethnicity to the number of births for each other ethnic group and  
33  
34 comparing this number to the observed number of stillbirths for that ethnic group.  
35  
36

37 All analyses were conducted in STATA/IC version 16.0.  
38  
39

### 40 *Patient and Public Involvement*

41  
42  
43 The MBRRACE-UK collaboration includes PPI representatives and bereaved parents. The MBRRACE-  
44  
45 UK collaboration has also established a third sector stakeholder group comprising representatives  
46  
47 from all relevant national mother and baby charities. The PPI stakeholder group are consulted about  
48  
49 the programme at an annual meeting held face-to-face in the past and remotely during the global  
50  
51 pandemic. We consult them by email between the annual meetings.  
52  
53  
54  
55  
56  
57  
58  
59  
60

## Results

Between January 2014 and December 2019 there were 4,391,569 singleton births at or above 24 weeks gestation to mothers resident in the UK, of which 16,013 ended in stillbirth (3.65 per 1,000 total births, 95% confidence interval 3.58 to 3.71). Of these, 14,633 were antepartum (3.33 per 1,000, 3.27 to 3.39), and 1,380 intrapartum (0.31 per 1,000, 0.29 to 0.34). Information about ethnicity was available for 93% of all births and 98% of stillbirths; of the 4,076,056 births with information on ethnicity, 76% were classified as White, 10% Asian (including Indian, Pakistani, Bangladeshi and Other Asian groups), 5% Black (including Black Caribbean, Black African and other Black groups), 6% mixed, and 3% other ethnicities (see Table 1).

Table 1 shows the number and rate of stillbirths by ethnicity, socioeconomic deprivation, maternal age, year, and country of residence. Stillbirth rates were substantially higher in babies of Black (7.58 per 1,000, 95% CI: 7.19 to 7.99) and Asian (5.66 per 1,000, 5.42 to 5.90) ethnicities compared with babies of White (3.40 per 1,000, 95% CI: 3.33 to 3.47), mixed (3.77, 3.52 to 4.03), and Chinese or other (3.80, 3.45 to 4.17) ethnicities. Aggregating the Asian ethnicities masked higher stillbirth rates of 6.57 per 1,000 (95% CI: 6.17 to 6.99) for babies of Pakistani ethnicity and 5.53 per 1,000 (4.93 to 6.20) for babies of Bangladeshi ethnicity compared with babies of Indian ethnicity (4.97 per 1,000, 4.58 to 5.38). Stillbirth rates were universally high for babies of Black Caribbean (7.43 per 1,000, 95% CI: 6.54 to 8.43), Black African (7.64, 7.17 to 8.13) and other Black (7.47, 6.42 to 8.70) ethnicities. Stillbirth rates increased with socioeconomic deprivation, from 2.70 per 1,000 (95% CI: 2.58 to 2.81) in the least deprived quintile, to 4.80 per 1,000 (4.64 to 4.96) in the most deprived quintile. Stillbirth rates were highest in the youngest (<20 years: 4.81 per 1,000, 95% CI: 4.46 to 5.19) and oldest (>40 years: 5.42 per 1,000, 5.09 to 5.79) mothers. Stillbirth rates decreased over time from 3.96 per 1,000 (95% CI: 3.81 to 4.11) in 2014 to 3.24 per 1,000 (3.10 to 3.38) in 2019, a decrease of 18% over the six year period.

**Table 1: Number of births (total, live births and stillbirths) and stillbirth rates per 1,000 total births by sociodemographic characteristics for births in the United Kingdom: 2014 to 2019**

|                     |                         | Total births | Live births | Stillbirths | Stillbirth rate (95% CI) |
|---------------------|-------------------------|--------------|-------------|-------------|--------------------------|
| <b>Year</b>         | 2014                    | 749,288      | 746,322     | 2,966       | 3.96 (3.81 to 4.11)      |
|                     | 2015                    | 754,545      | 751,732     | 2,813       | 3.73 (3.59 to 3.87)      |
|                     | 2016                    | 752,232      | 749,328     | 2,904       | 3.86 (3.72 to 4.01)      |
|                     | 2017                    | 733,283      | 730,623     | 2,660       | 3.63 (3.49 to 3.77)      |
|                     | 2018                    | 710,197      | 707,768     | 2,429       | 3.42 (3.28 to 3.56)      |
|                     | 2019                    | 692,024      | 689,783     | 2,241       | 3.24 (3.10 to 3.38)      |
| <b>Ethnic group</b> | White                   | 3,116,448    | 3,105,855   | 10,593      | 3.40 (3.33 to 3.47)      |
|                     | Asian                   | 426,050      | 423,640     | 2,410       | 5.66 (5.42 to 5.90)      |
|                     | Indian                  | 124,065      | 123,449     | 616         | 4.97 (4.58 to 5.38)      |
|                     | Pakistani               | 166,443      | 165,350     | 1,093       | 6.57 (6.17 to 6.99)      |
|                     | Bangladeshi             | 57,517       | 57,199      | 318         | 5.53 (4.93 to 6.20)      |
|                     | Other Asian             | 78,025       | 77,642      | 383         | 4.91 (4.44 to 5.43)      |
|                     | Black                   | 185,861      | 184,452     | 1,409       | 7.58 (7.19 to 7.99)      |
|                     | Black Caribbean         | 31,780       | 31,544      | 236         | 7.43 (6.54 to 8.43)      |
|                     | Black African           | 132,005      | 130,997     | 1,008       | 7.64 (7.17 to 8.13)      |
|                     | Black other             | 22,076       | 21,911      | 165         | 7.47 (6.42 to 8.70)      |
|                     | Mixed                   | 231,818      | 230,945     | 873         | 3.77 (3.52 to 4.03)      |
|                     | Other                   | 115,879      | 115,439     | 440         | 3.80 (3.45 to 4.17)      |
| <b>Country</b>      | England                 | 3,765,551    | 3,751,863   | 13,688      | 3.64 (3.57 to 3.70)      |
|                     | Wales                   | 188,002      | 187,241     | 761         | 4.05 (3.75 to 4.36)      |
|                     | Scotland                | 300,309      | 299,237     | 1,072       | 3.57 (3.36 to 3.80)      |
|                     | Northern Ireland        | 137,707      | 137,215     | 492         | 3.57 (3.26 to 3.91)      |
| <b>Deprivation</b>  | Least deprived quintile | 882,217      | 879,838     | 2,379       | 2.70 (2.58 to 2.81)      |
|                     | 2nd quintile            | 872,282      | 869,595     | 2,687       | 3.08 (2.96 to 3.21)      |
|                     | 3rd quintile            | 873,814      | 870,669     | 3,145       | 3.60 (3.47 to 3.73)      |
|                     | 4th quintile            | 877,204      | 873,630     | 3,574       | 4.07 (3.94 to 4.22)      |
|                     | Most deprived quintile  | 873,171      | 868,981     | 4,190       | 4.80 (4.64 to 4.96)      |
| <b>Maternal age</b> | <20 years               | 140,920      | 140,242     | 678         | 4.81 (4.46 to 5.19)      |
|                     | 20-24 years             | 644,229      | 641,519     | 2,710       | 4.21 (4.05 to 4.37)      |
|                     | 25-29 years             | 1,205,330    | 1,201,156   | 4,174       | 3.46 (3.35 to 3.58)      |
|                     | 30-34 years             | 1,360,207    | 1,355,712   | 4,495       | 3.31 (3.20 to 3.41)      |
|                     | 35-39 years             | 761,204      | 758,207     | 2,997       | 3.94 (3.79 to 4.09)      |
|                     | 40+ years               | 176,447      | 175,490     | 957         | 5.42 (5.09 to 5.79)      |
| <b>Gestation</b>    | 24-27 weeks             | 15,041       | 11,271      | 3,770       | 250.7 (243.9 to 257.7)   |
|                     | 28-31 weeks             | 28,378       | 25,729      | 2,649       | 93.3 (90.01 to 96.8)     |
|                     | 32-36 weeks             | 225,196      | 221,198     | 3,998       | 17.8 (17.2 to 18.3)      |
|                     | 37+ weeks               | 4,003,991    | 3,998,421   | 5,570       | 1.39 (1.35 to 1.43)      |

1  
2  
3  
4  
5  
6 Absolute differences in stillbirth rates between ethnicities, adjusted for year of birth and country of  
7  
8 residence, before and after additional adjustment for deprivation and maternal age are shown in  
9  
10 Table 2. The absolute difference in stillbirth rates was slightly attenuated after adjustment for  
11  
12 deprivation and maternal age; here we discuss the adjusted rates. Adjusted stillbirth rates were 3.6  
13  
14 per 1,000 higher or more for babies of Black ethnicities (Rate difference: Black African: 3.83 per  
15  
16 1,000, 95% CI: 3.35 to 4.32; Black Caribbean: 3.60, 2.65 to 4.55; Other Black: 3.76, 2.62 to 4.89)  
17  
18 compared with babies of White ethnicity, equating to a doubling of risk (Table 2). For babies of Asian  
19  
20 ethnicity, the absolute rate difference compared to babies of White ethnicity was highest for babies  
21  
22 of Pakistani, (2.99 per 1,000, 95% CI: 2.58 to 3.40) and Bangladeshi ethnicities (1.89, 1.26 to 2.52).  
23  
24 This relates to a 44 to 87% increased risk compared to babies of White ethnicity. For babies of  
25  
26 Indian and other Asian ethnicities, the adjusted absolute differences were less at 1.71 per 1,000  
27  
28 (95% CI: 1.30 to 2.11) and 1.48 per 1,000 (0.98 to 1.97) respectively, but still significantly higher than  
29  
30 babies of White ethnicity. Babies of mixed and Chinese or other ethnicities had similar adjusted rates  
31  
32 of stillbirth to babies of White ethnicity, with adjusted absolute rate differences of 0.27 per 1,000  
33  
34 (95% CI: 0.02 to 0.53) and 0.25 per 1,000 (-0.10 to 0.60) respectively. After adjustment, babies born  
35  
36 to mothers living in the most deprived quintile had an increased absolute rate difference of 1.5  
37  
38 stillbirths per 1,000 total births compared to the least deprived quintile (1.50; 95% 1.32 to 1.67)  
39  
40 (Table 2).  
41  
42  
43  
44  
45  
46  
47  
48  
49  
50  
51  
52  
53  
54  
55  
56  
57  
58  
59  
60

**Table 2: Adjusted disparities in rates of stillbirth for ethnic groups, deprivation quintile and maternal age for births in the United Kingdom: 2014 to 2019**

|                                           | Base models<br>Rate difference (95% CI) | Multivariable model<br>Rate difference (95% CI) |
|-------------------------------------------|-----------------------------------------|-------------------------------------------------|
| <b>Ethnic group</b>                       |                                         |                                                 |
| White                                     | 0                                       | 0                                               |
| Indian                                    | 1.66 (1.65 to 1.66)                     | 1.71 (1.30 to 2.11)                             |
| Pakistani                                 | 3.26 (2.85 to 3.67)                     | 2.99 (2.58 to 3.40)                             |
| Bangladeshi                               | 2.22 (1.58 to 2.85)                     | 1.89 (1.26 to 2.52)                             |
| Other Asian                               | 1.62 (1.12 to 2.12)                     | 1.48 (0.98 to 1.97)                             |
| Black Caribbean                           | 4.14 (3.19 to 5.08)                     | 3.60 (2.65 to 4.55)                             |
| Black African                             | 4.32 (3.84 to 4.8)                      | 3.83 (3.35 to 4.32)                             |
| Other Black                               | 4.18 (3.04 to 5.31)                     | 3.76 (2.62 to 4.89)                             |
| Mixed                                     | 0.45 (0.19 to 0.71)                     | 0.27 (0.02 to 0.53)                             |
| Other                                     | 0.45 (0.09 to 0.82)                     | 0.25 (-0.10 to 0.6)                             |
| <b>Deprivation</b>                        |                                         |                                                 |
| Most deprived vs. least deprived quintile | 2.08 (1.91 to 2.24)                     | 1.50 (1.32 to 1.67)                             |
| <b>Age</b>                                |                                         |                                                 |
| <20 years                                 | 1.47 (1.09 to 1.85)                     | 1.41 (1.01 to 1.80)                             |
| 20-24 years                               | 0.88 (0.69 to 1.07)                     | 0.78 (0.58 to 0.97)                             |
| 25-29 years                               | 0.15 (0.00 to 0.30)                     | 0.05 (-0.09 to 0.19)                            |
| 30-34 years                               | 0                                       | 0                                               |
| 35-39 years                               | 0.65 (0.47 to 0.82)                     | 0.57 (0.40 to 0.75)                             |
| 40+ years                                 | 2.12 (1.76 to 2.49)                     | 1.88 (1.51 to 2.25)                             |

<sup>1</sup> Individual models (adjusted for country of residence and year of birth only)

<sup>2</sup> Multivariable model (also adjusted for country of residence and year of birth)

Figure 1 shows the proportion of total births (live and stillbirths) within each deprivation quintile for each ethnicity. The colour of the bars depict the stillbirth rate for babies within each ethnic group and deprivation quintile. This highlights that a much higher proportion of babies of Bangladeshi (41.7%), Black African (39.2%), other Black (38.8%), and Black Caribbean (37.3%) ethnicities are born to mothers living in the most deprived quintile. It also highlights the increased stillbirth rates experienced by babies of Black African, other Black, and Black Caribbean ethnicities across

1  
2  
3 deprivation quintile, and similarly for babies of Bangladeshi and Pakistani ethnicities. The combined  
4  
5 impact of living in the most deprived quintile for a baby of Black African ethnicity leads to an  
6  
7 increase in stillbirth rates of 5.70 per 1,000 (95% CI: 5.20 to 6.21) compared with babies of White  
8  
9 ethnicity born to mothers living in the least deprived quintile. Despite the far higher proportion of  
10  
11 babies of Bangladeshi, Black African, other Black, and Black Caribbean ethnicities living in most  
12  
13 deprived areas, ethnic inequalities were similar across socioeconomic deprivation quintiles (p-value  
14  
15 for interaction=0.31). There was no evidence of ethnic inequalities in stillbirth rates changing  
16  
17 significantly between 2014 and 2019, shown by a non-significant interaction between ethnic group  
18  
19 and year in the adjusted model (p=0.22).  
20  
21  
22  
23  
24  
25  
26  
27

#### FIGURE 1

28  
29  
30  
31  
32 By applying the rate of stillbirth for babies of White ethnicity to all other ethnic groups, we  
33  
34 estimated that 1,869 stillbirths could potentially have been prevented over the six years from 2014  
35  
36 to 2019 if ethnic inequalities did not exist, a 12% reduction in stillbirths. The largest reduction in the  
37  
38 number of stillbirths would be in the Pakistani (527 stillbirths) and Black African (559 stillbirths)  
39  
40 groups.  
41  
42  
43

44  
45 Figure 2 shows the cause of stillbirth by baby's ethnicity. Stillbirth rates for most causes showed  
46  
47 similar patterns to overall differences by ethnicity (Figure 2a). The highest rates of stillbirth were  
48  
49 attributed to unexplained causes, with rates much higher in babies of Black African (2.99 per 1,000  
50  
51 total births, 95% CI: 2.70 to 3.29), Black Caribbean (2.90, 2.30 to 3.49) than babies of white ethnicity  
52  
53 (1.29, 1.25 to 1.33), but also higher in babies of Asian ethnicities (2.24-2.56/1,000). Stillbirth rates  
54  
55 (per 1,000 total births) caused by congenital anomalies were substantially higher for babies of  
56  
57 Pakistani ethnicity (1.05, 95% CI: 0.89 to 1.20), Bangladeshi (0.80, 0.57 to 1.03), Black African (0.63,  
58  
59  
60

1  
2  
3 0.49 to 0.76), and Other Black (0.73, 0.37 to 1.08) ethnicities than babies of White ethnicity (0.19,  
4 0.17 to 0.20). Rates of congenital anomalies for babies of Indian ethnicity (0.24, 0.16 to 0.33) were  
5 similar to babies of White ethnicity. Babies of Black ethnicities had around double the rate of  
6 stillbirths associated with placental causes compared with babies of White ethnicity (Black  
7 Caribbean: 2.24 per 1,000, Black African: 1.97 per 1,000, White: 1.03/1,000).  
8  
9  
10  
11  
12  
13  
14  
15  
16  
17

18 FIGURE2  
19  
20  
21  
22

23 Since the percentage of stillbirths due to congenital anomalies is likely to be influenced by both  
24 access and choices around prenatal screening and termination of pregnancy, we reviewed the  
25 percentage of deaths attributed to each cause excluding congenital anomalies (Figure 3). In total,  
26 over 40% of stillbirths were recorded as unknown cause. The proportion of stillbirths of unknown  
27 cause was higher in babies of Bangladeshi (57.9%), Indian (51.5%) and other Asian (60.2%)  
28 ethnicities compared with all other ethnicities, where the proportion recorded as unknown cause  
29 was 43-47%. Conversely, a lower proportion of deaths attributed to placental causes was observed  
30 for these groups, with 18.5% for Bangladeshi and 19.1% for other Asian ethnicities compared with  
31 36.3% for babies of Pakistani ethnicity, 34.2% for White, and 34.0% for Black Caribbean ethnicities.  
32  
33  
34  
35  
36  
37  
38  
39  
40  
41  
42  
43  
44  
45  
46  
47  
48  
49  
50  
51  
52  
53  
54  
55  
56  
57  
58  
59  
60

FIGURE3



## Discussion

Stillbirth rates for singleton births in the United Kingdom have decreased by 18% between 2014 and 2019, but ethnic inequalities persist. Crude stillbirth rates are highest in babies of Black African, Black Caribbean, and Pakistani ethnicities and adjusting for deprivation and maternal age only marginally attenuated this increased risk. The increased risks associated with deprivation were consistent for all ethnic groups. However, higher proportions of babies of Black Caribbean, Black African, Bangladeshi and Pakistani ethnicities born to mothers living in the most deprived areas placing them at additional risk. Rates of stillbirth attributed to unknown causes were high, with particularly high rates for babies of Black ethnicities, and accounted for high proportions of stillbirths for babies of Asian ethnicities. Key causes of stillbirth were placental related causes and congenital anomalies, which had higher rates in babies of Black ethnicities.

A major strength of our study is the use of high quality population surveillance data for mortality over a six-year period, with complete ascertainment of stillbirths from 24 weeks gestation including termination of pregnancies. This ensures generalisability to the UK population as well as providing detailed information on cause of death and facilitating exclusion of termination of pregnancies from stillbirth estimates. Few high-income countries have similar active national programme of stillbirth surveillance.<sup>6</sup> Our large sample size allowed exploration of ethnicity with more granularity as recommended by Khunti et al.<sup>27</sup> to ensure disaggregation of groups with different cultural, religious, social and economic experiences. This highlighted differences in stillbirth rates between babies of Indian, Pakistani and Bangladeshi ethnicities not seen in previous studies<sup>28 29</sup> which looked at aggregated data. However, surveillance data has limitations associated with routine data. Routine ethnicity classification is in principle self-defined, but in reality may be assigned by the health professional completing the notification<sup>30</sup> with potential for misclassification. Misclassification has been found to be a particular issue for more granular mixed and other ethnic groups<sup>31</sup>, here we report on granular Asian and Black ethnic groups where misclassification is less of a problem, and aggregated mixed or other ethnic groups.

1  
2  
3 Measurement of deprivation is limited to area level data on income deprivation and there is a lack of  
4  
5 information on other potentially important modifiable risk factors for all births. MBRRACE-UK are  
6  
7 currently undertaking a Confidential Enquiry to review the quality of care provision for Black  
8  
9 mothers who experience a stillbirth or neonatal death which will facilitate greater understanding  
10  
11 than can be attained through routine data alone.  
12  
13

14  
15 Our finding of increased stillbirth rates in babies of Black and Asian ethnicities is consistent with  
16  
17 other UK <sup>28 29 32</sup> and international studies<sup>7</sup> but few studies have explored differences in cause of  
18  
19 death by ethnicity, and recent ONS estimates for England and Wales give infant mortality rates by  
20  
21 ethnicity and limited cause of death, but not for stillbirth.<sup>11</sup> Our finding of inequalities in stillbirth  
22  
23 rates caused by congenital anomalies could be influenced by access and choices surrounding  
24  
25 termination of pregnancies, with Pakistani mothers in particular less likely to choose to terminate  
26  
27 their pregnancy when an anomaly is identified, while termination rates are also lower in more  
28  
29 deprived areas.<sup>33</sup> There may be differences in provision and/or uptake of antenatal screening for  
30  
31 Pakistani women,<sup>34</sup> a population where consanguinity is also more prevalent.<sup>35</sup>  
32  
33

34  
35  
36 Further emphasis on the need for collecting detailed information on cause of death in national  
37  
38 surveillance programmes will aid our understanding of the high rates of stillbirth experienced by  
39  
40 babies of Black and Asian ethnicities and improve our ability to monitor and reduce stillbirth  
41  
42 inequalities<sup>36</sup>. Efforts to increase uptake of post mortem<sup>37</sup> and other investigations after stillbirth  
43  
44 could reduce the high numbers of unexplained stillbirths seen in our study and in other high income  
45  
46 countries<sup>36</sup>. A new classification system being piloted by the International Stillbirth Alliance could  
47  
48 facilitate this and address the limitations of current practices which have insufficient detail on  
49  
50 placental pathology resulting in large proportions of unexplained stillbirths.<sup>38</sup> These strategies will  
51  
52 facilitate the design of services to address the specific needs of the populations they serve and  
53  
54 reduce unacceptable ethnic inequalities.  
55  
56  
57  
58  
59  
60

1  
2  
3 **Figure 1: Stillbirth rates by ethnicity and deprivation quintile, with bar sizes reflecting the**  
4 **percentage of babies for each ethnicity born in each deprivation quintile, and colours**  
5 **showing the stillbirth rate within these groups.**  
6  
7  
8  
9

10  
11  
12 **Figure 2: Cause of death for stillbirths (rate per 1,000 total births) by ethnic group for**  
13 **births in the United Kingdom: 2014 to 2019**  
14  
15

16  
17  
18  
19 **Figure 3: Cause of death for stillbirths as a percent of stillbirths (excluding those caused by**  
20 **congenital anomalies) by ethnic group for births in the United Kingdom: 2014 to 2019**  
21  
22  
23  
24  
25  
26  
27  
28  
29  
30  
31  
32  
33  
34  
35  
36  
37  
38  
39  
40  
41  
42  
43  
44  
45  
46  
47  
48  
49  
50  
51  
52  
53  
54  
55  
56  
57  
58  
59  
60

### Author Contributions

The corresponding author attests that all listed authors meet authorship criteria and that no others meeting the criteria have been omitted.

JK is the Principle Investigator holding the grant to deliver the Maternal, Newborn and Infant Clinical Outcome Review programme by the MBRRACE-UK collaboration. ESD leads the perinatal arm of the MBRRACE-UK programme. ESD, ACF, BM & LKS are members of the MBRRACE-UK collaboration. Contributions are as follows: funding: ESD, JK, BM, LKS; supervision: ESD, BM LKS; conceptualisation and study design: ESD, JK, BM, RJM, LKS; Data curation: IG, BM, RJM; methodology: BM, RJM, LKS; Statistical analysis: RJM, LKS; visualisation; RJM, LKS, original draft: RJM,LKS. All authors were involved with reviewing, critically appraising and editing the manuscript. All authors have approved the final version. RJM is guarantor. The corresponding author attests that all listed authors meet authorship criteria and no others meeting the criteria have been omitted.

### Funding

The MBRRACE-UK collaboration is commissioned by the Healthcare Quality Improvement Partnership (HQIP) to deliver the Maternal, Newborn and Infant Clinical Outcome Review Programme on behalf of NHS England, the devolved Governments of Wales, Scotland and Northern Ireland, and the Governments of the British Crown Dependencies.

### Competing interest statement

All authors have completed the Unified Competing Interest form (available on request from the corresponding author) and declare:

ESD, JD-B, ACF, IG, JK, BKM RJM, LKS had no support from any organisation for the submitted work; no financial relationships with any organisations that might have an interest in the submitted work in the previous three years, no other relationships or activities that could appear to have influenced the submitted work.

### Ethical approval

Not required. Approvals were granted for UK collection of patient identifiable data and access to statutory data without consent as follows:

England and Wales: National Information Governance Board ECC 5-05 (f)/2012 (from 10.10.2012) and the Confidentiality Advisory Group of the Health Research Authority 15/CAG/0119 (from 01.05.2015); Health & Social Care Information Centre (HSCIC), Data Access Advisory Group:DARS-NIC-359651-H3R1P-v5.2.

Scotland - The NHS Scotland Caldicott Guardian: 2014-62 MBRRACE-UK Programme – Update (2013-05) the Public Benefit and Privacy Panel for Health and Social Care (1920-0131) and The Privacy Advisory Committee, ISD, NHS National Services Scotland: PAC16/14. Due to the different data privacy arrangements in Northern Ireland only de-identified data is provided to the MNICORP programme.

### Data sharing

Data may be requested from the data controller, the Healthcare Quality Improvement Partnership (HQIP). A Data Access Request Form can be obtained from [https://www.hqip.org.uk/national-programmes/accessing-ncapop-data/#.XQeml\\_IKhjU](https://www.hqip.org.uk/national-programmes/accessing-ncapop-data/#.XQeml_IKhjU).

### Acknowledgements

We would particularly like to thank all MBRRACE-UK Lead Reporters and other staff in NHS Trusts, Health Boards and Health and Social Care Trusts across the UK and those from the Crown Dependencies, whose contribution made it possible to collect the MBRRACE-UK data and conduct this analysis.

For peer review only

## References

1. Knight M, Bunch K, Tuffnell D, et al. Saving Lives, Improving Mothers' Care - Lessons learned to inform maternity care from the UK and Ireland Confidential Enquiries into Maternal Deaths and Morbidity 2015-17. Oxford: National Perinatal Epidemiology Unit, University of Oxford 2019.
2. Flenady V, Wojcieszek AM, Middleton P, et al. Stillbirths: recall to action in high-income countries. *The Lancet* 2016;387(10019):691-702. doi: 10.1016/s0140-6736(15)01020-x
3. Zeitlin J, Mortensen L, Prunet C, et al. Socioeconomic inequalities in stillbirth rates in Europe: measuring the gap using routine data from the Euro-Peristat Project. *BMC Pregnancy and Childbirth* 2016;16(1):15. doi: 10.1186/s12884-016-0804-4
4. Frøen JF, Friberg IK, Lawn JE, et al. Stillbirths: progress and unfinished business. *Lancet* 2016;387(10018):574-86. doi: 10.1016/s0140-6736(15)00818-1 [published Online First: 2016/01/23]
5. Drysdale H, Ranasinha S, Kendall A, et al. Ethnicity and the risk of late-pregnancy stillbirth. *Medical Journal of Australia* 2012;197(5):278-81. doi: <https://doi.org/10.5694/mja12.10125>
6. Norris T, Manktelow BN, Smith LK, et al. Causes and temporal changes in nationally collected stillbirth audit data in high-resource settings. *Seminars in fetal & neonatal medicine* 2017;22(3):118-28. doi: 10.1016/j.siny.2017.02.003 [published Online First: 2017/02/19]
7. Pruitt S, Hoyert D, Anderson K. Racial and Ethnic Disparities in Fetal Deaths - United States, 2015-2017. *MMWR Morbidity and Mortality Weekly Report: Centre for Disease Control and Prevention*, 2020:1277-82.
8. Damsted Rasmussen T, Villadsen SF, Kragh Andersen P, et al. Social and ethnic disparities in stillbirth and infant death in Denmark, 2005-2016. *Sci Rep* 2021;11(1):8001. doi: 10.1038/s41598-021-87084-3 [published Online First: 2021/04/14]
9. Vik ES, Aasheim V, Schytt E, et al. Stillbirth in relation to maternal country of birth and other migration related factors: a population-based study in Norway. *BMC Pregnancy Childbirth* 2019;19(1):5. doi: 10.1186/s12884-018-2140-3 [published Online First: 2019/01/07]
10. Draper E, Gallimore I, Smith L, et al. MBRRACE-UK Perinatal Mortality Surveillance Report: UK Perinatal Deaths for Births from January to December 2018. Leicester: Department of Health Sciences, University of Leicester, 2020.
11. Maddox T. Births and infant mortality by ethnicity in England and Wales: 2007 to 2019: Office for National Statistics 2021 [updated 26 May 2021. Available from: <https://www.ons.gov.uk/peoplepopulationandcommunity/healthandsocialcare/childhealth/articles/birthsandinfantmortalitybyethnicityinenglandandwales/2007to2019#trends-in-ethnicity><https://www.ons.gov.uk/peoplepopulationandcommunity/healthandsocialcare/childhealth/articles/birthsandinfantmortalitybyethnicityinenglandandwales/2007to2019#trends-in-ethnicity> accessed 07.06.2021 2021.
12. Oakley L, Maconochie N, Doyle P, et al. Multivariate analysis of infant death in England and Wales in 2005-2006, with focus on socio-economic status and deprivation. *Health Statistics Quarterly* 2009;42:22-39.
13. Kingdon C, Roberts D, Turner MA, et al. Inequalities and stillbirth in the UK: a meta-narrative review. *BMJ Open* 2019;9(9):e029672. doi: 10.1136/bmjopen-2019-029672
14. Connelly R, Gayle V, Lambert PS. Ethnicity and ethnic group measures in social survey research. *Methodological Innovations* 2016;9:2059799116642885. doi: 10.1177/2059799116642885
15. Zeitlin J, Mortensen L, Cuttini M, et al. Declines in stillbirth and neonatal mortality rates in Europe between 2004 and 2010: results from the Euro-Peristat project. *Journal of Epidemiology & Community Health* 2016;70(6):609-15.

16. UK Government. New maternity strategy to reduce the number of stillbirths 2017 [cited 2018 20.11.2018]. Available from: <https://www.gov.uk/government/news/new-maternity-strategy-to-reduce-the-number-of-stillbirths> accessed 20.11.2018 2018.
17. Maternity and Children Quality Improvement Collaborative. Scottish Patient Safety Programme: Healthcare Improvement Scotland; [Available from: <https://ihub.scot/improvement-programmes/scottish-patient-safety-programme-spsp/spsp-programmes-of-work/maternity-and-children-quality-improvement-collaborative-mcqic/maternity-care/stillbirth/> accessed 20.05.2021 2021.
18. National Stillbirth Working Group. 1000 Lives Plus 2012 [Available from: <http://www.1000livesplus.wales.nhs.uk/sitesplus/documents/1011/final%20tor%20member%20national%20stillbirth%20working%20group.pdf>.
19. NHS England. Saving Babies' Lives: A care bundle for reducing stillbirth 2016 [cited 2020 27.08.2020]. Available from: <https://www.england.nhs.uk/wp-content/uploads/2016/03/saving-babies-lives-car-bundl.pdf>.
20. NHS England. Saving Babies' Lives Care Bundle Version 2 (SBLCBv2), 2019.
21. Acute Care and Workforce, Acute Care and Quality, Resolution PEaM, et al. Safer Maternity Care - The National Maternity Safety Strategy - Progress and Next Steps: Department of Health; 2017 [cited 2020 27.08.2020]. Available from: [https://assets.publishing.service.gov.uk/government/uploads/system/uploads/attachment\\_data/file/662969/Safer\\_maternity\\_care\\_-\\_progress\\_and\\_next\\_steps.pdf](https://assets.publishing.service.gov.uk/government/uploads/system/uploads/attachment_data/file/662969/Safer_maternity_care_-_progress_and_next_steps.pdf).
22. Royal College of Obstetricians & Gynaecologists (RCOG). Each Baby Counts: 2015 Full Report. London: RCOG, 2015.
23. Kurinczuk J, Boby T, Prince S, et al. Learning from Standardised Reviews When Babies Die. National Perinatal Mortality Review Tool: Second Annual Report. Oxford: National Perinatal Epidemiology Unit, 2020.
24. Christopher G, Simpson P. Improving Birth Outcomes Requires Closing the Racial Gap. *American Journal of Public Health* 2014;104(S1):S10-S12. doi: 10.2105/ajph.2013.301817
25. Department for Work and Pensions, H.M. Revenue and Customs. Children in low income families: local area statistics: background information and methodology 2020 [updated 25.03.2021. Available from: <https://www.gov.uk/government/collections/children-in-low-income-families-local-area-statistics> accessed 14.06.2021 2021.
26. Frøen JF, Pinar H, Flenady V, et al. Causes of death and associated conditions (Codac) – a utilitarian approach to the classification of perinatal deaths. *BMC Pregnancy and Childbirth* 2009;9(1):22. doi: 10.1186/1471-2393-9-22
27. Khunti K, Routen A, Pareek M, et al. The language of ethnicity. *BMJ* 2020;371:m4493. doi: 10.1136/bmj.m4493 [published Online First: 2020/11/25]
28. Penn N, Oteng-Ntim E, Oakley LL, et al. Ethnic variation in stillbirth risk and the role of maternal obesity: analysis of routine data from a London maternity unit. *BMC Pregnancy and Childbirth* 2014;14:404. doi: 10.1186/s12884-014-0404-0
29. Khalil A, Rezende J, Akolekar R, et al. Maternal racial origin and adverse pregnancy outcome: a cohort study. *Ultrasound in obstetrics & gynecology : the official journal of the International Society of Ultrasound in Obstetrics and Gynecology* 2013;41(3):278-85. doi: 10.1002/uog.12313 [published Online First: 2012/10/02]
30. Moser K, Stanfield KM, Leon DA. Birthweight and gestational age by ethnic group, England and Wales 2005: introducing new data on births. *Health Stat Q* 2008(39):22-31, 34-55. [published Online First: 2008/09/25]
31. Jardine JE, Frémeaux A, Coe M, et al. Validation of ethnicity in administrative hospital data in women giving birth in England: cohort study. *BMJ Open* 2021;11(8):e051977. doi: 10.1136/bmjopen-2021-051977
32. Gardosi J, Madurasinghe V, Williams M, et al. Maternal and Fetal Risk Factors for Stillbirth: Population Based Study. *BMJ* 2013;346:f108.

- 1  
2  
3 33. Smith LK, Budd JLS, Field DJ, et al. Socioeconomic inequalities in outcome of pregnancy and  
4 neonatal mortality associated with congenital anomalies: population based study. *BMJ*  
5 2011;343:d4306. doi: 10.1136/bmj.d4306  
6  
7 34. Yu J. A systematic review of issues around antenatal screening and prenatal diagnostic  
8 testing for genetic disorders: women of Asian origin in western countries. *Health Soc Care*  
9 *Community* 2012;20(4):329-46. doi: 10.1111/j.1365-2524.2011.01036.x [published Online  
10 First: 2011/11/10]  
11 35. Sheridan E, Wright J, Small N, et al. Risk factors for congenital anomaly in a multiethnic birth  
12 cohort: an analysis of the Born in Bradford study. *Lancet* 2013;382(9901):1350-9. doi:  
13 10.1016/s0140-6736(13)61132-0 [published Online First: 2013/07/09]  
14 36. Reinebrant H, Leisher S, Coory M, et al. Making stillbirths visible: a systematic review of  
15 globally reported causes of stillbirth. *BJOG: An International Journal of Obstetrics &*  
16 *Gynaecology* 2018;125(2):212-24. doi: doi:10.1111/1471-0528.14971  
17 37. Evans MJ, Draper ES, Smith LK. Impact of sociodemographic and clinical factors on offer and  
18 parental consent to postmortem following stillbirth or neonatal death: a UK population-  
19 based cohort study. *Arch Dis Child Fetal Neonatal Ed* 2020;105(5):532-37. doi:  
20 10.1136/archdischild-2019-318226  
21 38. Flenady V, Frøen JF, Pinar H, et al. An evaluation of classification systems for stillbirth. *BMC*  
22 *Pregnancy and Childbirth* 2009;9(1):24. doi: 10.1186/1471-2393-9-24  
23  
24  
25  
26  
27  
28  
29  
30  
31  
32  
33  
34  
35  
36  
37  
38  
39  
40  
41  
42  
43  
44  
45  
46  
47  
48  
49  
50  
51  
52  
53  
54  
55  
56  
57  
58  
59  
60



Deprivation quintile

1  
2  
3  
4  
5  
6  
7  
8  
9  
10  
11  
12  
13  
14  
15  
16  
17  
18  
19  
20  
21  
22  
23  
24  
25  
26  
27  
28  
29  
30  
31  
32  
33  
34  
35  
36  
37  
38  
39  
40  
41

All births

White

Mixed

Other

Indian

Other Asian

Bangladeshi

Pakistani

Black Caribbean

Other Black

Black African

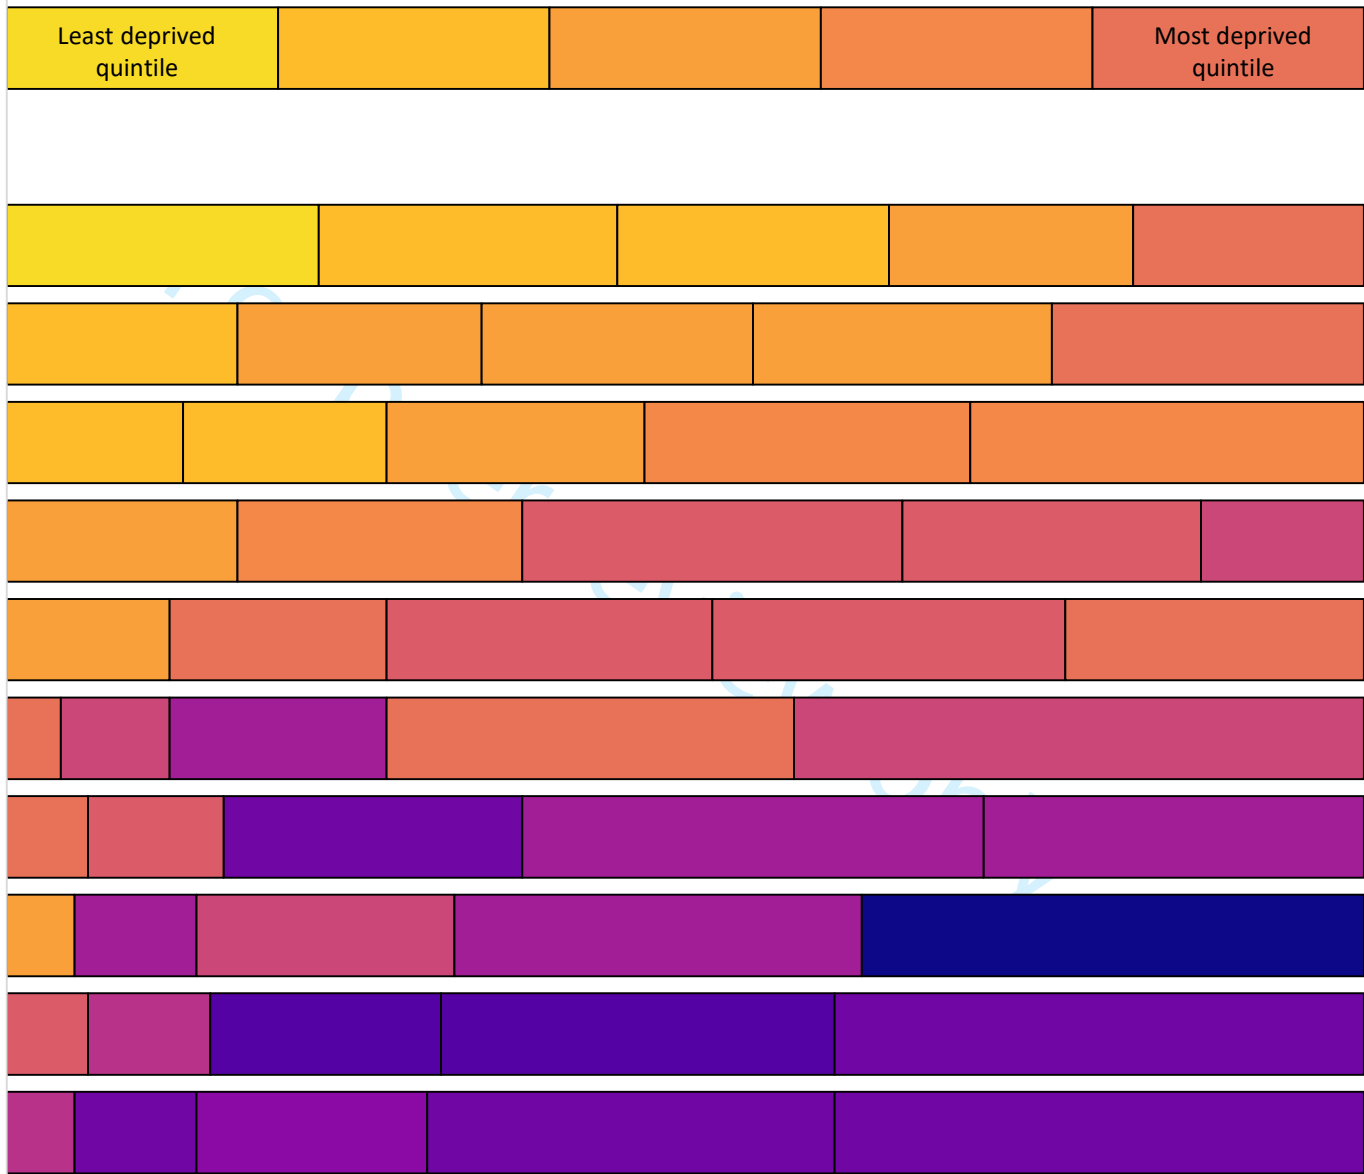

Stillbirth rate per 1000 births

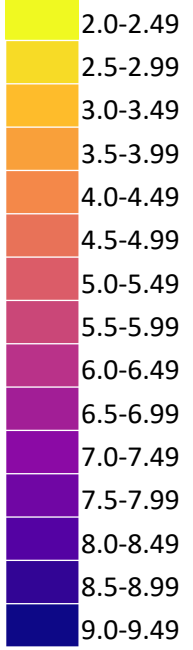

0% 10% 20% 30% 40% 50% 60% 70% 80% 90% 100%

Percentage of births in each deprivation quintile (ethnicity specific)

For peer review only - <http://open.bmj.com/site/ajph/articleGuidelines.xhtml>

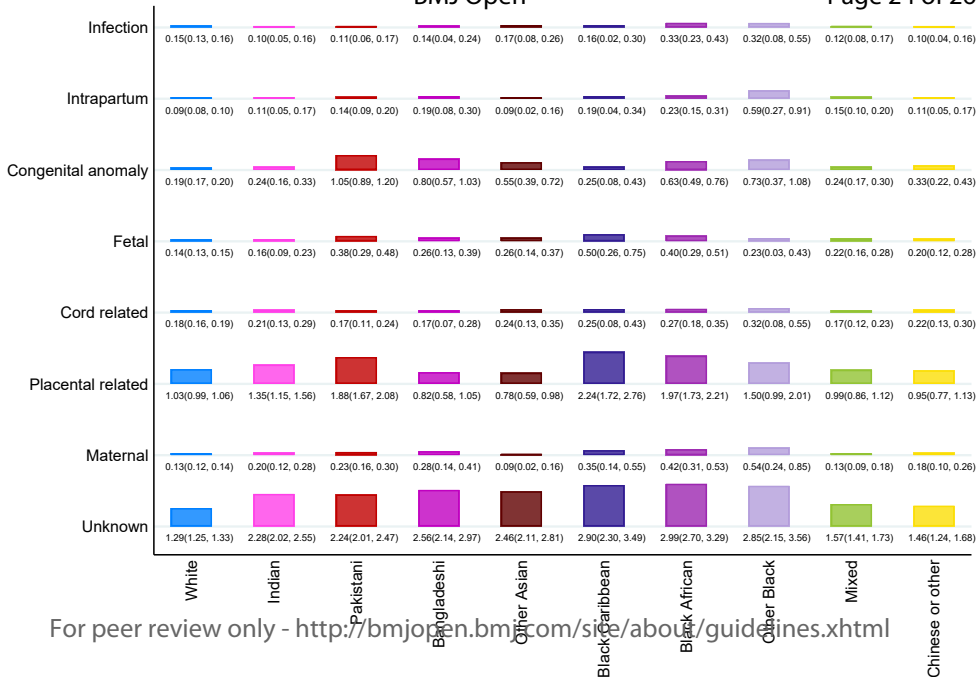

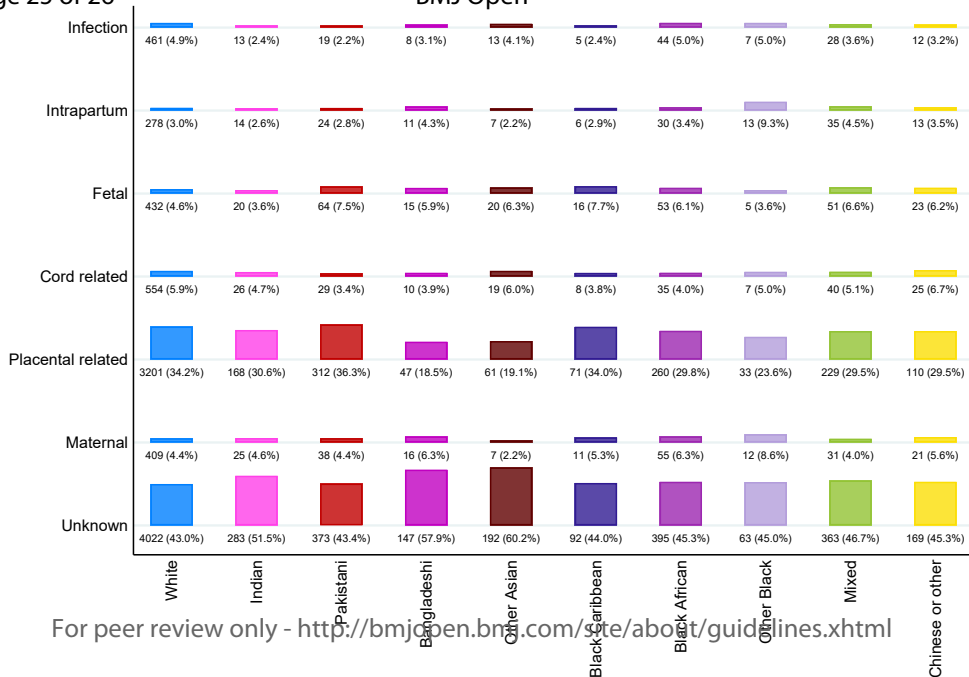

STROBE Statement—Checklist of items that should be included in reports of *cohort studies*

|                           | Item No | Recommendation                                                                                                                                                                                                                                                                                                         | Page No       |
|---------------------------|---------|------------------------------------------------------------------------------------------------------------------------------------------------------------------------------------------------------------------------------------------------------------------------------------------------------------------------|---------------|
| <b>Title and abstract</b> | 1       | (a) Indicate the study's design with a commonly used term in the title or the abstract<br>(b) Provide in the abstract an informative and balanced summary of what was done and what was found                                                                                                                          | P1 & P2<br>P2 |
| <b>Introduction</b>       |         |                                                                                                                                                                                                                                                                                                                        |               |
| Background/rationale      | 2       | Explain the scientific background and rationale for the investigation being reported                                                                                                                                                                                                                                   | P4            |
| Objectives                | 3       | State specific objectives, including any prespecified hypotheses                                                                                                                                                                                                                                                       | P4            |
| <b>Methods</b>            |         |                                                                                                                                                                                                                                                                                                                        |               |
| Study design              | 4       | Present key elements of study design early in the paper                                                                                                                                                                                                                                                                | P5            |
| Setting                   | 5       | Describe the setting, locations, and relevant dates, including periods of recruitment, exposure, follow-up, and data collection                                                                                                                                                                                        | P5            |
| Participants              | 6       | (a) Give the eligibility criteria, and the sources and methods of selection of participants. Describe methods of follow-up<br>(b) For matched studies, give matching criteria and number of exposed and unexposed                                                                                                      | P5            |
| Variables                 | 7       | Clearly define all outcomes, exposures, predictors, potential confounders, and effect modifiers. Give diagnostic criteria, if applicable                                                                                                                                                                               | P5-6          |
| Data sources/measurement  | 8*      | For each variable of interest, give sources of data and details of methods of assessment (measurement). Describe comparability of assessment methods if there is more than one group                                                                                                                                   | P5-6          |
| Bias                      | 9       | Describe any efforts to address potential sources of bias                                                                                                                                                                                                                                                              | P7            |
| Study size                | 10      | Explain how the study size was arrived at                                                                                                                                                                                                                                                                              | P5            |
| Quantitative variables    | 11      | Explain how quantitative variables were handled in the analyses. If applicable, describe which groupings were chosen and why                                                                                                                                                                                           | P5-7          |
| Statistical methods       | 12      | (a) Describe all statistical methods, including those used to control for confounding<br>(b) Describe any methods used to examine subgroups and interactions<br>(c) Explain how missing data were addressed<br>(d) If applicable, explain how loss to follow-up was addressed<br>(e) Describe any sensitivity analyses | P6-7          |
| <b>Results</b>            |         |                                                                                                                                                                                                                                                                                                                        |               |
| Participants              | 13*     | (a) Report numbers of individuals at each stage of study—eg numbers potentially eligible, examined for eligibility, confirmed eligible, included in the study, completing follow-up, and analysed<br>(b) Give reasons for non-participation at each stage<br>(c) Consider use of a flow diagram                        | P8            |
| Descriptive data          | 14*     | (a) Give characteristics of study participants (eg demographic, clinical, social) and information on exposures and potential confounders<br>(b) Indicate number of participants with missing data for each variable of interest<br>(c) Summarise follow-up time (eg, average and total amount)                         | P8 & Table 1  |
| Outcome data              | 15*     | Report numbers of outcome events or summary measures over time                                                                                                                                                                                                                                                         | Table 1,p9    |

|    |                          |    |                                                                                                                                                                                                              |        |
|----|--------------------------|----|--------------------------------------------------------------------------------------------------------------------------------------------------------------------------------------------------------------|--------|
| 1  | Main results             | 16 | (a) Give unadjusted estimates and, if applicable, confounder-adjusted estimates and their precision (eg, 95% confidence interval). Make clear which confounders were adjusted for and why they were included | P10-11 |
| 2  |                          |    | (b) Report category boundaries when continuous variables were categorized                                                                                                                                    |        |
| 3  |                          |    | (c) If relevant, consider translating estimates of relative risk into absolute risk for a meaningful time period                                                                                             |        |
| 4  |                          |    |                                                                                                                                                                                                              |        |
| 5  | Other analyses           | 17 | Report other analyses done—eg analyses of subgroups and interactions, and sensitivity analyses                                                                                                               | P12-13 |
| 6  | <b>Discussion</b>        |    |                                                                                                                                                                                                              |        |
| 7  | Key results              | 18 | Summarise key results with reference to study objectives                                                                                                                                                     | P14    |
| 8  | Limitations              | 19 | Discuss limitations of the study, taking into account sources of potential bias or imprecision. Discuss both direction and magnitude of any potential bias                                                   | P14-15 |
| 9  | Interpretation           | 20 | Give a cautious overall interpretation of results considering objectives, limitations, multiplicity of analyses, results from similar studies, and other relevant evidence                                   | P15    |
| 10 | Generalisability         | 21 | Discuss the generalisability (external validity) of the study results                                                                                                                                        | P14    |
| 11 | <b>Other information</b> |    |                                                                                                                                                                                                              |        |
| 12 | Funding                  | 22 | Give the source of funding and the role of the funders for the present study and, if applicable, for the original study on which the present article is based                                                | P17    |

\*Give information separately for exposed and unexposed groups.

**Note:** An Explanation and Elaboration article discusses each checklist item and gives methodological background and published examples of transparent reporting. The STROBE checklist is best used in conjunction with this article (freely available on the Web sites of PLoS Medicine at <http://www.plosmedicine.org/>, Annals of Internal Medicine at <http://www.annals.org/>, and Epidemiology at <http://www.epidem.com/>). Information on the STROBE Initiative is available at <http://www.strobe-statement.org>.

# BMJ Open

## Understanding ethnic inequalities in stillbirth rates: A UK population based cohort study

|                                 |                                                                                                                                                                                                                                                                                                                                                                                                                                                                                                                                                                                                                                                                                                                                              |
|---------------------------------|----------------------------------------------------------------------------------------------------------------------------------------------------------------------------------------------------------------------------------------------------------------------------------------------------------------------------------------------------------------------------------------------------------------------------------------------------------------------------------------------------------------------------------------------------------------------------------------------------------------------------------------------------------------------------------------------------------------------------------------------|
| Journal:                        | <i>BMJ Open</i>                                                                                                                                                                                                                                                                                                                                                                                                                                                                                                                                                                                                                                                                                                                              |
| Manuscript ID                   | bmjopen-2021-057412.R1                                                                                                                                                                                                                                                                                                                                                                                                                                                                                                                                                                                                                                                                                                                       |
| Article Type:                   | Original research                                                                                                                                                                                                                                                                                                                                                                                                                                                                                                                                                                                                                                                                                                                            |
| Date Submitted by the Author:   | 25-Nov-2021                                                                                                                                                                                                                                                                                                                                                                                                                                                                                                                                                                                                                                                                                                                                  |
| Complete List of Authors:       | Matthews, Ruth; University of Leicester College of Life Sciences, Department of Health Sciences<br>Draper, Elizabeth; University of Leicester College of Life Sciences, Department of Health Sciences<br>Manktelow, Bradley; University of Leicester College of Life Sciences, Department of Health Sciences<br>Kurinczuk, Jennifer; University of Oxford, National Perinatal Epidemiology Unit<br>Fenton, Alan; Royal Victoria Infirmary, Newcastle Neonatal Service<br>Dunkley-Bent, Jacqueline; NHS England and NHS Improvement London<br>Gallimore, Ian; University of Leicester College of Life Sciences, Department of Health Sciences<br>Smith, Lucy; University of Leicester College of Life Sciences, Department of Health Sciences |
| <b>Primary Subject Heading</b>: | Obstetrics and gynaecology                                                                                                                                                                                                                                                                                                                                                                                                                                                                                                                                                                                                                                                                                                                   |
| Secondary Subject Heading:      | Epidemiology, Public health                                                                                                                                                                                                                                                                                                                                                                                                                                                                                                                                                                                                                                                                                                                  |
| Keywords:                       | OBSTETRICS, EPIDEMIOLOGY, PUBLIC HEALTH                                                                                                                                                                                                                                                                                                                                                                                                                                                                                                                                                                                                                                                                                                      |
|                                 |                                                                                                                                                                                                                                                                                                                                                                                                                                                                                                                                                                                                                                                                                                                                              |

SCHOLARONE™  
Manuscripts

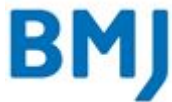

I, the Submitting Author has the right to grant and does grant on behalf of all authors of the Work (as defined in the below author licence), an exclusive licence and/or a non-exclusive licence for contributions from authors who are: i) UK Crown employees; ii) where BMJ has agreed a CC-BY licence shall apply, and/or iii) in accordance with the terms applicable for US Federal Government officers or employees acting as part of their official duties; on a worldwide, perpetual, irrevocable, royalty-free basis to BMJ Publishing Group Ltd ("BMJ") its licensees and where the relevant Journal is co-owned by BMJ to the co-owners of the Journal, to publish the Work in this journal and any other BMJ products and to exploit all rights, as set out in our [licence](#).

The Submitting Author accepts and understands that any supply made under these terms is made by BMJ to the Submitting Author unless you are acting as an employee on behalf of your employer or a postgraduate student of an affiliated institution which is paying any applicable article publishing charge ("APC") for Open Access articles. Where the Submitting Author wishes to make the Work available on an Open Access basis (and intends to pay the relevant APC), the terms of reuse of such Open Access shall be governed by a Creative Commons licence – details of these licences and which [Creative Commons](#) licence will apply to this Work are set out in our licence referred to above.

Other than as permitted in any relevant BMJ Author's Self Archiving Policies, I confirm this Work has not been accepted for publication elsewhere, is not being considered for publication elsewhere and does not duplicate material already published. I confirm all authors consent to publication of this Work and authorise the granting of this licence.

1  
2  
3 **Understanding ethnic inequalities in stillbirth rates: A UK population based**  
4  
5  
6 **cohort study**  
7  
8

9 Ruth J Matthews, Elizabeth S Draper, Bradley N Manktelow, Jennifer Kurinczuk, Alan C  
10 Fenton, Jacqueline Dunkley-Bent, Ian Gallimore, Lucy K Smith on behalf of the MBRRACE-UK  
11  
12  
13

14 Collaboration  
15

16  
17 Corresponding author: Ruth J Matthews, PhD Student, Department of Health Sciences, College of  
18 Life Sciences, George Davies Centre, University of Leicester, University Road, Leicester, LE1 7RH, UK  
19  
20 [rjm88@le.ac.uk](mailto:rjm88@le.ac.uk)  
21  
22  
23

24 Elizabeth S Draper, Professor of Perinatal and Paediatric Epidemiology, Department of Health  
25 Sciences, College of Life Sciences, University of Leicester, Leicester, UK  
26  
27

28  
29 Bradley N Manktelow, Professor of Medical Statistics, Department of Health Sciences, College of Life  
30 Sciences, University of Leicester, Leicester, UK  
31  
32

33  
34 Jennifer Kurinczuk, Professor of Perinatal Epidemiology, National Perinatal Epidemiology Unit,  
35 Nuffield Department of Population Health, University of Oxford, UK  
36  
37

38  
39 Alan C Fenton, Consultant Neonatal Paediatrician, Newcastle Neonatal Service, Royal Victoria  
40 Infirmary, Newcastle Upon Tyne, UK  
41  
42

43  
44 Jacqueline Dunkley-Bent, Professor of Midwifery, Chief Midwifery Officer, National Maternity Safety  
45 Champion, NHS England and NHS Improvement, London, UK  
46  
47

48  
49 Ian Gallimore, MBRRACE-UK Project Team Leader, Department of Health Sciences, College of Life  
50 Sciences, University of Leicester, Leicester, UK  
51  
52

53  
54 Lucy K Smith, Professor of Perinatal Health, Department of Health Sciences, College of Life Sciences,  
55 University of Leicester, UK  
56  
57  
58  
59  
60



1  
2  
3 Word count: 3,034  
4  
5

6 **Abstract**  
7

8  
9 **Objectives** –To investigate inequalities in stillbirth rates by ethnicity to facilitate development of  
10 initiatives to target those at highest risk.  
11  
12

13  
14 **Design** – Population-based perinatal mortality surveillance linked to national birth and death  
15 registration (MBRRACE-UK)  
16  
17

18  
19 **Setting** - UK  
20  
21

22 **Participants** –4,391,569 singleton births at  $\geq 24^{+0}$  weeks gestation between 2014 and 2019  
23  
24

25 **Main outcome measures** – Stillbirth rate difference per 1,000 total births by ethnicity.  
26  
27

28 **Results** – Adjusted absolute differences in stillbirth rates were higher for babies of Black African  
29 (3.83, 95% CI: 3.35 to 4.32), Black Caribbean (3.60, 95% CI: 2.65 to 4.55) and Pakistani (2.99, 95% CI  
30 2.58 to 3.40) ethnicities compared with White ethnicities. Higher proportions of babies of  
31 Bangladeshi (42%), Black African (39%), Black Caribbean (37%) and Pakistani (28%) ethnicities were  
32 from most deprived areas, which were associated with an additional risk of 1.50 stillbirths per 1,000  
33 births (95%CI 1.32 to 1.67) . Exploring primary cause of death, higher stillbirth rates due to  
34 congenital anomalies were observed in babies of Pakistani, Bangladeshi and Black African ethnicities  
35 (range 0.63 to 1.05 per 1,000 births) and more placental causes in Black ethnicities (range 1.97 to  
36 2.24 per 1,000 births). For the whole population over 40% of stillbirths were of unknown cause,  
37 however this was particularly high for babies of other Asian (60.0%), Bangladeshi (58.2%), and Indian  
38 (51.5%) ethnicities.  
39  
40  
41  
42  
43  
44  
45  
46  
47  
48  
49  
50  
51

52  
53 **Conclusions** - Stillbirth rates declined in the UK, but substantial excess risk of stillbirth persists  
54 among babies of Black and Asian ethnicities. The combined disadvantage for Black, Pakistani, and  
55 Bangladeshi ethnicities who are more likely to live in most deprived areas is associated with  
56 considerably higher rates. Key causes of death were congenital anomalies and placental causes.  
57  
58  
59  
60

1  
2  
3 Improved strategies for investigation of stillbirth causes are needed to reduce unexplained deaths so  
4  
5 that interventions can be targeted to reduce stillbirths.  
6  
7  
8  
9

## 10 **Article Summary**

### 11 12 **Strengths and limitations of this study**

- 13 • National data with complete ascertainment of all stillbirths over a 6 year period from 2014-  
14  
15 2019
- 16 • Inclusion of over 4 million births and over 16,000 stillbirths, which allows exploration of  
17  
18 ethnicity with greater granularity.
- 19 • Information on cause of death allows further understanding of inequalities in stillbirth rates.
- 20 • Despite reporting adjusted estimates, we cannot rule out residual confounding by  
21  
22 potentially important modifiable risk factors not measured for all births.
- 23 • Ethnicity from birth notifications is in principle self-defined, but in reality may sometimes be  
24  
25 assigned by health professionals and therefore subject to misclassification.  
26  
27  
28  
29  
30  
31  
32  
33  
34  
35  
36  
37  
38  
39

### 40 **Key words**

41  
42 Stillbirth, ethnic inequalities, perinatal mortality, mortality rates, cause of death  
43  
44  
45  
46  
47  
48  
49  
50  
51  
52  
53  
54  
55  
56  
57  
58  
59  
60

## Introduction

The worldwide Covid-19 pandemic has highlighted the unacceptable health inequalities experienced by individuals from different ethnic groups, and the issue is receiving the global attention it has long deserved. In the United Kingdom (UK), reports of ethnic inequalities in maternal mortality<sup>1</sup> have highlighted this issue and sparked the Fivexmore campaign to change Black women's maternal health outcomes (<https://www.fivexmore.com>). Stillbirths are a major health burden with large disparity between and, importantly, within countries.<sup>2-4</sup> Ethnic inequalities in stillbirth rates have been noted in a number of high-income countries including Australia,<sup>5</sup> New Zealand,<sup>6</sup> North America,<sup>7</sup> and Europe<sup>8,9</sup> with rates often over double for migrant mothers or minority ethnic groups compared with those of White ethnicity. Recent national stillbirth data for the UK<sup>10</sup> and England and Wales<sup>11</sup> similarly report stillbirth rates to be around twice as high in babies of Black ethnicity and 60% higher in babies of Asian ethnicity compared to babies of White ethnicity.

Research into ethnic inequalities in stillbirth rates is limited, and little is known about differences in the causes of stillbirth between ethnic groups. Studies including stillbirth cause are lacking detailed information on cause of death.<sup>7,11</sup> Minority ethnic groups in the UK are typically more socioeconomically disadvantaged and likely to have poorer health outcomes than the White population<sup>11,12</sup> and may have different age profiles because of migration patterns or cultural differences in timing of motherhood. It is therefore important to consider the impact these factors have on the association between ethnicity and stillbirth.<sup>13,14</sup>

Stillbirth rates are higher in the UK than many other comparable high-income countries, and are decreasing more slowly.<sup>2,15</sup> Despite targets set by the Governments across the UK to reduce stillbirths by between 35 and 50%<sup>16-18</sup> alongside a number of initiatives aimed at improving maternity services and care<sup>19-23</sup> improvements remain gradual. A greater impact on stillbirth rates may be achieved through better understanding of the multiple disadvantages that lead to higher risks of stillbirth<sup>2,24</sup> and the differences in the causes of death between ethnicities, so that initiatives

1  
2  
3 can be targeted towards those most in need and reduce evident inequalities in stillbirth rates. Here  
4  
5 we explore recent trends in UK stillbirth rates by ethnicity, the extent to which associations between  
6  
7 ethnicity and stillbirth are mediated by socioeconomic deprivation and maternal age, and whether  
8  
9 cause of death varies between ethnic groups.  
10  
11  
12  
13  
14  
15

## 16 **Methods**

17  
18 Data on all singleton live births and stillbirths from 24 weeks gestation to mothers resident in  
19  
20 England, Wales, Scotland and Northern Ireland between 1 January 2014 and 31 December 2019  
21  
22 were obtained from the Mothers and Babies: Reducing Risk through Audits and Confidential  
23  
24 Enquiries across the UK (MBRRACE-UK) perinatal mortality surveillance programme<sup>10</sup> linked to birth  
25  
26 notification and registration data. In January 2013, the Healthcare Quality Improvement Partnership  
27  
28 commissioned the MBRRACE-UK collaboration to collect UK perinatal mortality surveillance data.  
29  
30 MBRRACE-UK links detailed information on all deaths reported by UK hospitals with data on all births  
31  
32 from the Patient Demographic Service (formerly the NN4B birth notification system) and birth and  
33  
34 death registration data from the Office for National Statistics for England and Wales, National  
35  
36 Records Scotland and Information Services Division for Scotland and the Northern Ireland Maternity  
37  
38 System for Northern Ireland. MBRRACE-UK use stillbirth registrations from statutory notifications to  
39  
40 ensure complete ascertainment of stillbirths.  
41  
42  
43  
44  
45

46 Information about the baby's ethnicity is obtained via linkage with birth notification data for all  
47  
48 births. We categorise baby's ethnicity as: White, Indian, Pakistani, Bangladeshi, other Asian, Black  
49  
50 Caribbean, Black African and other Black, mixed ethnicities, and other (including Chinese). Minor  
51  
52 variations in ethnicity classification between the four UK countries prevented reporting rates for  
53  
54 more specific ethnicity groupings for babies of mixed ethnicity at the UK-level as well as for minority  
55  
56 White ethnic groups. Where routine ethnicity data was missing for a stillborn baby, we used  
57  
58 ethnicity as recorded in MBRRACE-UK surveillance data.  
59  
60

1  
2  
3 We used the Children in Low-Income Families Local Measure<sup>25</sup> as an estimate of socioeconomic  
4 deprivation. This is an area based measure of the proportion of children living in families that are  
5 either in receipt of out-of-work benefits or in receipt of tax credits with a reported income that is  
6 less than 60% of the national median income. We allocated this to mother's postcode of residence at  
7 the time of birth through data linkage at the small area level. We ranked all areas in the United  
8 Kingdom by deprivation score, dividing them into five groups with approximately equal numbers of  
9 births in each quintile. Birth notification data were also used to provide information about maternal  
10 age, which was grouped into five year age bands (<20 years, 20-24, 25-29, 30-34, 35-39 and 40+  
11 years).

12  
13  
14 Stillbirths were classified based on timing of death as intrapartum if the baby was known to be alive  
15 at the onset of the care episode which led to birth, and antepartum if the baby was not alive at  
16 onset of care or if the timing of death was unknown (n=559). Cause of death was classified by local  
17 MBRRACE-UK reporters at each hospital using the Cause of Death and Associated Conditions  
18 (CODAC) classification system<sup>26</sup> into the following first level categories: Infection, Intrapartum,  
19 Congenital Anomaly, Fetal, Cord Related, Placental Related, Maternal, or Unknown.

### 20 21 22 *Statistical Analysis*

23  
24 We calculated the observed stillbirth rate (per 1,000 total births) by ethnicity, deprivation quintile,  
25 maternal age, country of residence at time of birth and year of birth. Binomial regression models  
26 with identity link were fitted to explore the absolute difference in stillbirth rates separately for  
27 ethnicity, deprivation quintile (fitted as a continuous variable after assessment of linearity) and  
28 maternal age, with variance adjusted for clustering within small area (Lower super output area or  
29 data zone). These models were adjusted for country of residence (England, Scotland, Wales and  
30 Northern Ireland) to allow for differences in policy between the devolved nations that may influence  
31 stillbirth rates, and year of birth, to allow for differences in stillbirth rates over time. Multivariable  
32 models were then fitted including all factors to take into account confounding of maternal age and  
33  
34  
35  
36  
37  
38  
39  
40  
41  
42  
43  
44  
45  
46  
47  
48  
49  
50  
51  
52  
53  
54  
55  
56  
57  
58  
59  
60

1  
2  
3 deprivation on estimates of ethnic differences in stillbirth rates. Interactions were fitted between  
4  
5 ethnicity and deprivation quintile to explore whether the effect of deprivation was varied by  
6  
7 ethnicity. Trends in ethnic inequalities over time were explored by fitting interactions with year of  
8  
9 birth.  
10

### 11 12 *Sensitivity analyses*

13  
14  
15 Multivariable models reported here are on a complete case basis, but repeating analyses including  
16  
17 individuals with missing data for covariates using an additional category for those with missing data  
18  
19 did not materially affect the results. Causes of death were examined before and after exclusion of  
20  
21 stillbirths where the primary cause of death was congenital anomalies, because of the association  
22  
23 with access and choices surrounding termination of pregnancy for fetal anomaly.  
24  
25

26  
27 The excess stillbirth rate associated with ethnicity was calculated by applying the stillbirth rate  
28  
29 observed for babies of White ethnicity to the number of births for each other ethnic group and  
30  
31 comparing this number to the observed number of stillbirths for that ethnic group.  
32  
33

34  
35 All analyses were conducted in STATA/IC version 16.0.  
36  
37

### 38 *Patient and Public Involvement (PPI)*

39  
40 The ongoing MBRRACE-UK collaboration includes PPI representatives and bereaved parents. The  
41  
42 MBRRACE-UK collaboration has also established a third sector stakeholder group comprising  
43  
44 representatives from all relevant national mother and baby charities. The PPI stakeholder group are  
45  
46 consulted about the programme at an annual meeting held face-to-face in the past and remotely  
47  
48 during the global pandemic. We consult them by email between the annual meetings.  
49  
50  
51  
52  
53  
54  
55  
56  
57  
58  
59  
60

## Results

Between January 2014 and December 2019 there were 4,391,569 singleton births at or above 24 weeks gestation to mothers resident in the UK, of which 16,013 ended in stillbirth (3.65 per 1,000 total births, 95% confidence interval (95% CI) 3.58 to 3.71). Of these, 14,633 were antepartum (3.33 per 1,000, 95% CI: 3.27 to 3.39), and 1,380 intrapartum (0.31 per 1,000, 95% CI: 0.29 to 0.34).

Information about ethnicity was available for 93% of all births and 98% of stillbirths; of the 4,076,056 births with information on ethnicity, 76% were classified as White, 10% Asian (including Indian, Pakistani, Bangladeshi and Other Asian groups), 5% Black (including Black Caribbean, Black African and other Black groups), 6% mixed, and 3% other ethnicities (see Table 1).

Table 1 shows the number and rate of stillbirths by ethnicity, socioeconomic deprivation, maternal age, year, and country of residence. Stillbirth rates were substantially higher in babies of Black (7.58 per 1,000, 95% CI: 7.19 to 7.99) and Asian (5.66 per 1,000, 95% CI: 5.42 to 5.90) ethnicities compared with babies of White (3.40 per 1,000, 95% CI: 3.33 to 3.47), mixed (3.77, 95% CI: 3.52 to 4.03), and Chinese or other (3.80, 95% CI: 3.45 to 4.17) ethnicities. Aggregating the Asian ethnicities masked higher stillbirth rates of 6.57 per 1,000 (95% CI: 6.17 to 6.99) for babies of Pakistani ethnicity and 5.82 per 1,000 (95% CI: 5.21 to 6.51) for babies of Bangladeshi ethnicity compared with babies of Indian ethnicity (4.97 per 1,000, 95% CI: 4.58 to 5.38). Stillbirth rates were universally high for babies of Black ethnicity, with rates of over 7 per 1,000 births (Table 1). Stillbirth rates increased with socioeconomic deprivation, from 2.70 per 1,000 (95% CI: 2.58 to 2.81) in the least deprived quintile, to 4.80 per 1,000 (95% CI: 4.64 to 4.96) in the most deprived quintile. Stillbirth rates were highest in the youngest (<20 years) and oldest (>40 years) mothers (Table 1). There was an 18% decrease in stillbirth rates over six years (Table 1).

**Table 1: Number of births (total, live births and stillbirths) and stillbirth rates per 1,000 total births by sociodemographic characteristics for births in the United Kingdom: 2014 to 2019**

|                         |                         | Total births | Live births | Stillbirths | Stillbirth rate (95% CI) |
|-------------------------|-------------------------|--------------|-------------|-------------|--------------------------|
| <b>Year</b>             | 2014                    | 749,288      | 746,322     | 2,966       | 3.96 (3.81 to 4.11)      |
|                         | 2015                    | 754,545      | 751,732     | 2,813       | 3.73 (3.59 to 3.87)      |
|                         | 2016                    | 752,232      | 749,328     | 2,904       | 3.86 (3.72 to 4.01)      |
|                         | 2017                    | 733,283      | 730,623     | 2,660       | 3.63 (3.49 to 3.77)      |
|                         | 2018                    | 710,197      | 707,768     | 2,429       | 3.42 (3.28 to 3.56)      |
|                         | 2019                    | 692,024      | 689,783     | 2,241       | 3.24 (3.10 to 3.38)      |
| <b>Baby's ethnicity</b> | White                   | 3,116,448    | 3,105,855   | 10,593      | 3.40 (3.33 to 3.47)      |
|                         | Asian                   | 426,050      | 423,640     | 2,410       | 5.66 (5.42 to 5.90)      |
|                         | Indian                  | 124,065      | 123,449     | 616         | 4.97 (4.58 to 5.38)      |
|                         | Pakistani               | 166,443      | 165,350     | 1,093       | 6.57 (6.17 to 6.99)      |
|                         | Bangladeshi             | 57,517       | 57,199      | 335         | 5.82 (5.21 to 6.51)      |
|                         | Other Asian             | 78,025       | 77,642      | 366         | 4.69 (4.23 to 5.20)      |
|                         | Black                   | 185,861      | 184,452     | 1,409       | 7.58 (7.19 to 7.99)      |
|                         | Black Caribbean         | 31,780       | 31,544      | 236         | 7.43 (6.54 to 8.43)      |
|                         | Black African           | 132,005      | 130,997     | 1,008       | 7.64 (7.17 to 8.13)      |
|                         | Black other             | 22,076       | 21,911      | 165         | 7.47 (6.42 to 8.70)      |
|                         | Mixed                   | 231,818      | 230,945     | 873         | 3.77 (3.52 to 4.03)      |
|                         | Other                   | 115,879      | 115,439     | 440         | 3.80 (3.45 to 4.17)      |
| <b>Country</b>          | England                 | 3,765,551    | 3,751,863   | 13,688      | 3.64 (3.57 to 3.70)      |
|                         | Wales                   | 188,002      | 187,241     | 761         | 4.05 (3.75 to 4.36)      |
|                         | Scotland                | 300,309      | 299,237     | 1,072       | 3.57 (3.36 to 3.80)      |
|                         | Northern Ireland        | 137,707      | 137,215     | 492         | 3.57 (3.26 to 3.91)      |
| <b>Deprivation</b>      | Least deprived quintile | 882,217      | 879,838     | 2,379       | 2.70 (2.58 to 2.81)      |
|                         | 2nd quintile            | 872,282      | 869,595     | 2,687       | 3.08 (2.96 to 3.21)      |
|                         | 3rd quintile            | 873,814      | 870,669     | 3,145       | 3.60 (3.47 to 3.73)      |
|                         | 4th quintile            | 877,204      | 873,630     | 3,574       | 4.07 (3.94 to 4.22)      |
|                         | Most deprived quintile  | 873,171      | 868,981     | 4,190       | 4.80 (4.64 to 4.96)      |
| <b>Maternal age</b>     | <20 years               | 140,920      | 140,242     | 678         | 4.81 (4.46 to 5.19)      |
|                         | 20-24 years             | 644,229      | 641,519     | 2,710       | 4.21 (4.05 to 4.37)      |
|                         | 25-29 years             | 1,205,330    | 1,201,156   | 4,174       | 3.46 (3.35 to 3.58)      |
|                         | 30-34 years             | 1,360,207    | 1,355,712   | 4,495       | 3.31 (3.20 to 3.41)      |
|                         | 35-39 years             | 761,204      | 758,207     | 2,997       | 3.94 (3.79 to 4.09)      |
|                         | 40+ years               | 176,447      | 175,490     | 957         | 5.42 (5.09 to 5.79)      |



1  
2  
3 Absolute differences in stillbirth rates between ethnicities, adjusted for year of birth and country of  
4 residence, before and after additional adjustment for deprivation and maternal age are shown in  
5  
6 Table 2. The absolute difference in stillbirth rates was slightly attenuated after adjustment for  
7  
8 deprivation and maternal age; here we discuss the adjusted rates. Adjusted stillbirth rates were 3.6  
9  
10 per 1,000 higher or more for babies of Black ethnicities compared with babies of White ethnicity,  
11  
12 equating to a doubling of risk (Table 2). For babies of Asian ethnicity, the absolute rate difference  
13  
14 compared to babies of White ethnicity was highest for babies of Pakistani, (2.99 per 1,000, 95% CI:  
15  
16 2.58 to 3.40) and Bangladeshi ethnicities (2.18 per 1,000, 95% CI: 1.54 to 2.83). This relates to a 61 to  
17  
18 88% increased risk compared to babies of White ethnicity. For babies of Indian and other Asian  
19  
20 ethnicities, the adjusted absolute differences were less, but still significantly higher than babies of  
21  
22 White ethnicity (Table 2). After adjustment, babies born to mothers living in the most deprived  
23  
24 quintile had an increased absolute rate difference of 1.5 stillbirths per 1,000 total births compared  
25  
26 to the least deprived quintile (1.50, 95% 1.32 to 1.67).  
27  
28  
29  
30  
31  
32  
33  
34  
35  
36  
37  
38  
39  
40  
41  
42  
43  
44  
45  
46  
47  
48  
49  
50  
51  
52  
53  
54  
55  
56  
57  
58  
59  
60

**Table 2: Adjusted disparities in rates of stillbirth for ethnic groups, deprivation quintile and maternal age for births in the United Kingdom: 2014 to 2019**

|                                           | <b>Base models</b><br>Rate difference (95% CI) | <b>Multivariable model</b><br>Rate difference (95% CI) |
|-------------------------------------------|------------------------------------------------|--------------------------------------------------------|
| <b>Baby's ethnicity</b>                   |                                                |                                                        |
| White                                     | 0                                              | 0                                                      |
| Indian                                    | 1.66 (1.25 to 2.06)                            | 1.71 (1.30 to 2.11)                                    |
| Pakistani                                 | 3.26 (2.85 to 3.67)                            | 2.99 (2.58 to 3.40)                                    |
| Bangladeshi                               | 2.51 (1.86 to 3.16)                            | 2.18 (1.54 to 2.83)                                    |
| Other Asian                               | 1.41 (0.92 to 1.90)                            | 1.27 (0.79 to 1.76)                                    |
| Black Caribbean                           | 4.14 (3.19 to 5.08)                            | 3.60 (2.65 to 4.55)                                    |
| Black African                             | 4.32 (3.84 to 4.80)                            | 3.83 (3.35 to 4.32)                                    |
| Other Black                               | 4.18 (3.04 to 5.31)                            | 3.76 (2.62 to 4.89)                                    |
| Mixed                                     | 0.45 (0.19 to 0.71)                            | 0.27 (0.02 to 0.53)                                    |
| Other                                     | 0.45 (0.09 to 0.82)                            | 0.25 (-0.10 to 0.60)                                   |
| <b>Deprivation</b>                        |                                                |                                                        |
| Most deprived vs. least deprived quintile | 2.08 (1.91 to 2.24)                            | 1.50 (1.32 to 1.67)                                    |
| <b>Age</b>                                |                                                |                                                        |
| <20 years                                 | 1.47 (1.09 to 1.85)                            | 1.41 (1.01 to 1.80)                                    |
| 20-24 years                               | 0.88 (0.69 to 1.07)                            | 0.78 (0.58 to 0.97)                                    |
| 25-29 years                               | 0.15 (0.00 to 0.30)                            | 0.05 (-0.09 to 0.19)                                   |
| 30-34 years                               | 0                                              | 0                                                      |
| 35-39 years                               | 0.65 (0.47 to 0.82)                            | 0.57 (0.40 to 0.75)                                    |
| 40+ years                                 | 2.12 (1.76 to 2.49)                            | 1.88 (1.51 to 2.25)                                    |

<sup>1</sup> Separate models for ethnicity, deprivation and maternal age, each model adjusted for country of residence and year of birth.

<sup>2</sup> Multivariable model including ethnicity, deprivation and maternal age (also adjusted for country of residence and year of birth)

Figure 1 shows the proportion of total births (live and stillbirths) within each deprivation quintile for each ethnicity (For underlying numbers see supplementary table S1). The colour of the bars depict the stillbirth rate for babies within each ethnic group and deprivation quintile. This highlights that a much higher proportion of babies of Bangladeshi (41.7%), Black African (39.2%), other Black (38.8%), and Black Caribbean (37.3%) ethnicities are born to mothers living in the most deprived quintile. It

1  
2  
3 also highlights the increased stillbirth rates experienced by babies of Black African, other Black, and  
4 Black Caribbean ethnicities across deprivation quintile, and similarly for babies of Bangladeshi and  
5 Pakistani ethnicities. The combined impact of living in the most deprived quintile for a baby of Black  
6 African ethnicity leads to an increase in stillbirth rates of 5.70 per 1,000 (95% CI: 5.20 to 6.21)  
7 compared with babies of White ethnicity born to mothers living in the least deprived quintile.  
8 Despite the far higher proportion of babies of Bangladeshi, Black African, other Black, and Black  
9 Caribbean ethnicities living in most deprived areas, ethnic inequalities were similar across  
10 socioeconomic deprivation quintiles (p-value for interaction=0.31). There was no evidence of ethnic  
11 inequalities in stillbirth rates changing significantly between 2014 and 2019, shown by a non-  
12 significant interaction between ethnicity and year in the adjusted model (p=0.22).  
13  
14  
15  
16  
17  
18  
19  
20  
21  
22  
23  
24  
25  
26  
27  
28  
29

#### FIGURE 1

30  
31  
32  
33  
34  
35 By applying the rate of stillbirth for babies of White ethnicity to all other ethnic groups, we  
36 estimated that 1,869 stillbirths could potentially have been prevented over the six years from 2014  
37 to 2019 if ethnic inequalities did not exist, a 12% reduction in stillbirths. The largest reduction in the  
38 number of stillbirths would be in the Pakistani (527 stillbirths) and Black African (559 stillbirths)  
39 groups.  
40  
41  
42  
43  
44  
45

46  
47 Figure 2 shows the cause of stillbirth by baby's ethnicity. Stillbirth rates for most causes showed  
48 similar patterns to overall differences by ethnicity (Figure 2a). Stillbirth rates with no known cause  
49 were much higher in babies of Black African (2.99 per 1,000, 95% CI: 2.70 to 3.29), Black Caribbean  
50 (2.90 per 1,000, 95% CI: 2.30 to 3.49) than babies of white ethnicity (1.29 per 1,000, 95% CI: 1.25 to  
51 1.33), but also higher in babies of Asian ethnicities (ranging from 2.24 per 1,000 to 2.56 per 1,000).  
52  
53  
54  
55  
56  
57  
58 Stillbirth rates (per 1,000 total births) where the primary cause was a congenital anomaly were  
59  
60

1  
2  
3 substantially higher for babies of Pakistani, Bangladeshi, Black African, and Other Black ethnicities.  
4  
5 Rates of congenital anomalies for babies of Indian ethnicity (0.24 per 1,000, 95% CI: 0.16 to 0.33)  
6  
7 were similar to babies of White ethnicity. Babies of Black ethnicities had around double the rate of  
8  
9 stillbirths associated with placental causes compared with babies of White ethnicity (Figure 2).  
10  
11  
12  
13  
14  
15

#### 16 FIGURE2

17  
18  
19  
20  
21 Since the percentage of stillbirths due to congenital anomalies is likely to be influenced by both  
22  
23 access and choices around prenatal screening and termination of pregnancy, we reviewed the  
24  
25 percentage of deaths attributed to each cause excluding congenital anomalies (Figure 3). In total,  
26  
27 over 40% of stillbirths were recorded as unknown cause. The proportion of stillbirths of unknown  
28  
29 cause was higher in babies of Bangladeshi (58.2%), Indian (51.5%) and other Asian (60.0%)  
30  
31 ethnicities compared with all other ethnicities, where the proportion recorded as unknown cause  
32  
33 was 43 to 47%. Conversely, a lower proportion of deaths attributed to placental causes was  
34  
35 observed for these groups (Figure 3).  
36  
37  
38  
39  
40  
41  
42  
43  
44

#### 45 FIGURE3

### 46 Discussion

47  
48 Stillbirth rates for singleton births in the United Kingdom have decreased by 18% between 2014 and  
49  
50 2019, but ethnic inequalities persist. Crude stillbirth rates are highest in babies of Black African,  
51  
52 Black Caribbean, and Pakistani ethnicities and adjusting for deprivation and maternal age only  
53  
54 marginally attenuated this increased risk. The increased risks associated with deprivation were  
55  
56 consistent for all ethnic groups. However, higher proportions of babies of Black Caribbean, Black  
57  
58 African, Bangladeshi and Pakistani ethnicities born to mothers living in the most deprived areas  
59  
60

1  
2  
3 placing them at additional risk. Rates of stillbirth attributed to unknown causes were high, with  
4 particularly high rates for babies of Black ethnicities, and accounted for high proportions of stillbirths  
5 for babies of Asian ethnicities. Key causes of stillbirth were placental related causes and congenital  
6 anomalies, which had higher rates in babies of Black ethnicities.  
7  
8  
9  
10  
11  
12

13  
14 A major strength of our study is the use of high quality population surveillance data for mortality  
15 over a six-year period, with complete ascertainment of stillbirths from 24 weeks gestation including  
16 termination of pregnancies. This ensures generalisability to the UK population as well as providing  
17 detailed information on cause of death and facilitating exclusion of termination of pregnancies from  
18 stillbirth estimates. Few high-income countries have similar active national programme of stillbirth  
19 surveillance.<sup>6</sup> Our large sample size allowed exploration of ethnicity with more granularity as  
20 recommended by Khunti et al.<sup>27</sup> to avoid combining groups with different cultural, religious, social  
21 and economic experiences. This highlighted differences in stillbirth rates between babies of Indian,  
22 Pakistani and Bangladeshi ethnicities not seen in previous studies<sup>28 29</sup> which looked at aggregated  
23 data. However, surveillance data has limitations associated with routine data. Routine ethnicity  
24 classification is in principle self-defined, but in reality may be assigned by the health professional  
25 completing the notification<sup>30</sup> with potential for misclassification. Misclassification has been found to  
26 be a particular issue for more granular mixed and other ethnic groups<sup>31</sup>, here we report on granular  
27 Asian and Black ethnic groups where misclassification is less of a problem, and aggregated mixed or  
28 other ethnic groups.  
29  
30  
31  
32  
33  
34  
35  
36  
37  
38  
39  
40  
41  
42  
43  
44  
45  
46  
47

48 Measurement of deprivation is limited to area level data on income deprivation. In addition, there is  
49 a lack of information in the birth notification data regarding mother's country of birth, gravidity and  
50 previous stillbirths as well as other potentially modifiable risk factors such as antenatal attendance  
51 and smoking during pregnancy. Therefore, residual confounding cannot be ruled out. MBRRACE-UK  
52 are currently undertaking a Confidential Enquiry to review the quality of care provision for Black  
53  
54  
55  
56  
57  
58  
59  
60

1  
2  
3 mothers who experience a stillbirth or neonatal death which will facilitate greater understanding  
4  
5 than can be attained through routine data surveillance alone.  
6  
7

8 Our finding of increased stillbirth rates in babies of Black and Asian ethnicities is consistent with  
9  
10 other UK <sup>28 29 32</sup> and international studies<sup>7</sup> but few studies have explored differences in cause of  
11  
12 death by ethnicity, and recent ONS estimates for England and Wales give infant mortality rates by  
13  
14 ethnicity and limited cause of death, but not for stillbirth.<sup>11</sup> Our finding of inequalities in stillbirth  
15  
16 rates caused by congenital anomalies could be influenced by access and choices surrounding  
17  
18 termination of pregnancies, with Pakistani mothers in particular less likely to choose to terminate  
19  
20 their pregnancy when an anomaly is identified, while termination rates are also lower in more  
21  
22 deprived areas.<sup>33</sup> There may be differences in provision and/or uptake of antenatal screening for  
23  
24 Pakistani women,<sup>34</sup> a population where consanguinity is also more prevalent.<sup>35</sup>  
25  
26  
27  
28

29 Further emphasis on the need for collecting detailed information on cause of death in national  
30  
31 surveillance programmes will aid our understanding of the high rates of stillbirth experienced by  
32  
33 babies of Black and Asian ethnicities and improve our ability to monitor and reduce stillbirth  
34  
35 inequalities<sup>36</sup>. Efforts to increase uptake of post mortem<sup>37</sup> and other investigations after stillbirth  
36  
37 could reduce the high numbers of stillbirths of unknown cause seen in our study and in other high  
38  
39 income countries<sup>36</sup>. The International Stillbirth Alliance are in the process of developing and  
40  
41 evaluating a hybrid classification system building on the strengths of existing classification systems<sup>38</sup>  
42  
43 such as CODAC and incorporating the principles of the WHO ICD-PM classification. This should  
44  
45 address the limitations of current classification systems such as the lack of sufficient detail on  
46  
47 placental pathology resulting in large proportions of unexplained stillbirths.<sup>39</sup> These strategies will  
48  
49 facilitate the design of services to address the specific needs of the populations they serve and  
50  
51 reduce unacceptable ethnic inequalities.  
52  
53  
54  
55  
56  
57  
58  
59  
60

1  
2  
3 **Figure 1: Stillbirth rates by ethnicity and deprivation quintile, with bar sizes reflecting the**  
4 **percentage of babies for each ethnicity born in each deprivation quintile, and colours**  
5 **showing the stillbirth rate within these groups.**  
6  
7  
8  
9

10  
11  
12 **Figure 2: Cause of death for stillbirths (rate per 1,000 total births) by baby's ethnicity for**  
13 **births in the United Kingdom: 2014 to 2019**  
14  
15

16  
17  
18  
19 **Figure 3: Cause of death for stillbirths as a percent of stillbirths (excluding those caused by**  
20 **congenital anomalies) by baby's ethnicity for births in the United Kingdom: 2014 to 2019**  
21  
22  
23  
24  
25  
26  
27  
28  
29  
30  
31  
32  
33  
34  
35  
36  
37  
38  
39  
40  
41  
42  
43  
44  
45  
46  
47  
48  
49  
50  
51  
52  
53  
54  
55  
56  
57  
58  
59  
60

### Author Contributions

The corresponding author attests that all listed authors meet authorship criteria and that no others meeting the criteria have been omitted.

JK is the Principal Investigator holding the grant to deliver the Maternal, Newborn and Infant Clinical Outcome Review programme by the MBRRACE-UK collaboration. ESD leads the perinatal arm of the MBRRACE-UK programme. ESD, ACF, BM & LKS are members of the MBRRACE-UK collaboration. Contributions are as follows: funding: ESD, JK, BM, LKS; supervision: ESD, BM LKS; conceptualisation and study design: J D-B, ESD, JK, BM, RJM, LKS; Data curation: IG, BM, RJM; methodology: BM, RJM, LKS; Statistical analysis: RJM, LKS; visualisation; RJM, LKS, original draft: RJM,LKS. All authors were involved with reviewing, critically appraising and editing the manuscript. All authors have approved the final version. RJM is guarantor. The corresponding author attests that all listed authors meet authorship criteria and no others meeting the criteria have been omitted.

### Funding

The MBRRACE-UK collaboration is commissioned by the Healthcare Quality Improvement Partnership (HQIP) to deliver the Maternal, Newborn and Infant Clinical Outcome Review Programme on behalf of NHS England, the devolved Governments of Wales, Scotland and Northern Ireland, and the Governments of the British Crown Dependencies.

### Competing interest statement

All authors have completed the Unified Competing Interest form (available on request from the corresponding author) and declare:

ESD, JD-B, ACF, IG, JK, BKM RJM, LKS had no support from any organisation for the submitted work; no financial relationships with any organisations that might have an interest in the submitted work in the previous three years, no other relationships or activities that could appear to have influenced the submitted work.

### Ethical approval

Not required. Approvals were granted for UK collection of patient identifiable data and access to statutory data without consent as follows:

England and Wales: National Information Governance Board ECC 5-05 (f)/2012 (from 10.10.2012) and the Confidentiality Advisory Group of the Health Research Authority 15/CAG/0119 (from 01.05.2015); Health & Social Care Information Centre (HSCIC), Data Access Advisory Group:DARS-NIC-359651-H3R1P-v5.2.

Scotland - The NHS Scotland Caldicott Guardian: 2014-62 MBRRACE-UK Programme – Update (2013-05) the Public Benefit and Privacy Panel for Health and Social Care (1920-0131) and The Privacy Advisory Committee, ISD, NHS National Services Scotland: PAC16/14. Due to the different data privacy arrangements in Northern Ireland only de-identified data is provided to the MNICORP programme.



### Data availability statement

Data may be requested from the data controller, the Healthcare Quality Improvement Partnership (HQIP). A Data Access Request Form can be obtained from [https://www.hqip.org.uk/national-programmes/accessing-ncapop-data/#.XQeml\\_IKhjU](https://www.hqip.org.uk/national-programmes/accessing-ncapop-data/#.XQeml_IKhjU).

### Acknowledgements

We would particularly like to thank all MBRRACE-UK Lead Reporters and other staff in NHS Trusts, Health Boards and Health and Social Care Trusts across the UK and those from the Crown Dependencies, whose contribution made it possible to collect the MBRRACE-UK data and conduct this analysis.

For peer review only

## References

1. Knight M, Bunch K, Tuffnell D, et al. Saving Lives, Improving Mothers' Care - Lessons learned to inform maternity care from the UK and Ireland Confidential Enquiries into Maternal Deaths and Morbidity 2015-17. Oxford: National Perinatal Epidemiology Unit, University of Oxford 2019.
2. Flenady V, Wojcieszek AM, Middleton P, et al. Stillbirths: recall to action in high-income countries. *The Lancet* 2016;387(10019):691-702. doi: 10.1016/s0140-6736(15)01020-x
3. Zeitlin J, Mortensen L, Prunet C, et al. Socioeconomic inequalities in stillbirth rates in Europe: measuring the gap using routine data from the Euro-Peristat Project. *BMC Pregnancy and Childbirth* 2016;16(1):15. doi: 10.1186/s12884-016-0804-4
4. Frøen JF, Friberg IK, Lawn JE, et al. Stillbirths: progress and unfinished business. *Lancet* 2016;387(10018):574-86. doi: 10.1016/s0140-6736(15)00818-1 [published Online First: 2016/01/23]
5. Drysdale H, Ranasinha S, Kendall A, et al. Ethnicity and the risk of late-pregnancy stillbirth. *Medical Journal of Australia* 2012;197(5):278-81. doi: <https://doi.org/10.5694/mja12.10125>
6. Norris T, Manktelow BN, Smith LK, et al. Causes and temporal changes in nationally collected stillbirth audit data in high-resource settings. *Seminars in fetal & neonatal medicine* 2017;22(3):118-28. doi: 10.1016/j.siny.2017.02.003 [published Online First: 2017/02/19]
7. Pruitt S, Hoyert D, Anderson K. Racial and Ethnic Disparities in Fetal Deaths - United States, 2015-2017. *MMWR Morbidity and Mortality Weekly Report: Centre for Disease Control and Prevention*, 2020:1277-82.
8. Damsted Rasmussen T, Villadsen SF, Kragh Andersen P, et al. Social and ethnic disparities in stillbirth and infant death in Denmark, 2005-2016. *Sci Rep* 2021;11(1):8001. doi: 10.1038/s41598-021-87084-3 [published Online First: 2021/04/14]
9. Vik ES, Aasheim V, Schytt E, et al. Stillbirth in relation to maternal country of birth and other migration related factors: a population-based study in Norway. *BMC Pregnancy Childbirth* 2019;19(1):5. doi: 10.1186/s12884-018-2140-3 [published Online First: 2019/01/07]
10. Draper E, Gallimore I, Smith L, et al. MBRRACE-UK Perinatal Mortality Surveillance Report: UK Perinatal Deaths for Births from January to December 2018. Leicester: Department of Health Sciences, University of Leicester, 2020.
11. Maddox T. Births and infant mortality by ethnicity in England and Wales: 2007 to 2019: Office for National Statistics 2021 [updated 26 May 2021. Available from: <https://www.ons.gov.uk/peoplepopulationandcommunity/healthandsocialcare/childhealth/articles/birthsandinfantmortalitybyethnicityinenglandandwales/2007to2019#trends-in-ethnicity><https://www.ons.gov.uk/peoplepopulationandcommunity/healthandsocialcare/childhealth/articles/birthsandinfantmortalitybyethnicityinenglandandwales/2007to2019#trends-in-ethnicity> accessed 07.06.2021 2021.
12. Oakley L, Maconochie N, Doyle P, et al. Multivariate analysis of infant death in England and Wales in 2005-2006, with focus on socio-economic status and deprivation. *Health Statistics Quarterly* 2009;42:22-39.
13. Kingdon C, Roberts D, Turner MA, et al. Inequalities and stillbirth in the UK: a meta-narrative review. *BMJ Open* 2019;9(9):e029672. doi: 10.1136/bmjopen-2019-029672
14. Connelly R, Gayle V, Lambert PS. Ethnicity and ethnic group measures in social survey research. *Methodological Innovations* 2016;9:2059799116642885. doi: 10.1177/2059799116642885
15. Zeitlin J, Mortensen L, Cuttini M, et al. Declines in stillbirth and neonatal mortality rates in Europe between 2004 and 2010: results from the Euro-Peristat project. *Journal of Epidemiology & Community Health* 2016;70(6):609-15.

16. UK Government. New maternity strategy to reduce the number of stillbirths 2017 [cited 2018 20.11.2018]. Available from: <https://www.gov.uk/government/news/new-maternity-strategy-to-reduce-the-number-of-stillbirths> accessed 20.11.2018 2018.
17. Maternity and Children Quality Improvement Collaborative. Scottish Patient Safety Programme: Healthcare Improvement Scotland; [Available from: <https://ihub.scot/improvement-programmes/scottish-patient-safety-programme-spsp/spsp-programmes-of-work/maternity-and-children-quality-improvement-collaborative-mcqic/maternity-care/stillbirth/> accessed 20.05.2021 2021.
18. National Stillbirth Working Group. 1000 Lives Plus 2012 [Available from: <http://www.1000livesplus.wales.nhs.uk/sitesplus/documents/1011/final%20tor%20membership%20national%20stillbirth%20working%20group.pdf>.
19. NHS England. Saving Babies' Lives: A care bundle for reducing stillbirth 2016 [cited 2020 27.08.2020]. Available from: <https://www.england.nhs.uk/wp-content/uploads/2016/03/saving-babies-lives-car-bundl.pdf>.
20. NHS England. Saving Babies' Lives Care Bundle Version 2 (SBLCBv2), 2019.
21. Acute Care and Workforce, Acute Care and Quality, Resolution PEaM, et al. Safer Maternity Care - The National Maternity Safety Strategy - Progress and Next Steps: Department of Health; 2017 [cited 2020 27.08.2020]. Available from: [https://assets.publishing.service.gov.uk/government/uploads/system/uploads/attachment\\_data/file/662969/Safer\\_maternity\\_care\\_-\\_progress\\_and\\_next\\_steps.pdf](https://assets.publishing.service.gov.uk/government/uploads/system/uploads/attachment_data/file/662969/Safer_maternity_care_-_progress_and_next_steps.pdf).
22. Royal College of Obstetricians & Gynaecologists (RCOG). Each Baby Counts: 2015 Full Report. London: RCOG, 2015.
23. Kurinczuk J, Boby T, Prince S, et al. Learning from Standardised Reviews When Babies Die. National Perinatal Mortality Review Tool: Second Annual Report. Oxford: National Perinatal Epidemiology Unit, 2020.
24. Christopher G, Simpson P. Improving Birth Outcomes Requires Closing the Racial Gap. *American Journal of Public Health* 2014;104(S1):S10-S12. doi: 10.2105/ajph.2013.301817
25. Department for Work and Pensions, H.M. Revenue and Customs. Children in low income families: local area statistics: background information and methodology 2020 [updated 25.03.2021. Available from: <https://www.gov.uk/government/collections/children-in-low-income-families-local-area-statistics> accessed 14.06.2021 2021.
26. Frøen JF, Pinar H, Flenady V, et al. Causes of death and associated conditions (Codac) – a utilitarian approach to the classification of perinatal deaths. *BMC Pregnancy and Childbirth* 2009;9(1):22. doi: 10.1186/1471-2393-9-22
27. Khunti K, Routen A, Pareek M, et al. The language of ethnicity. *BMJ* 2020;371:m4493. doi: 10.1136/bmj.m4493 [published Online First: 2020/11/25]
28. Penn N, Oteng-Ntim E, Oakley LL, et al. Ethnic variation in stillbirth risk and the role of maternal obesity: analysis of routine data from a London maternity unit. *BMC Pregnancy and Childbirth* 2014;14:404. doi: 10.1186/s12884-014-0404-0
29. Khalil A, Rezende J, Akolekar R, et al. Maternal racial origin and adverse pregnancy outcome: a cohort study. *Ultrasound in obstetrics & gynecology : the official journal of the International Society of Ultrasound in Obstetrics and Gynecology* 2013;41(3):278-85. doi: 10.1002/uog.12313 [published Online First: 2012/10/02]
30. Moser K, Stanfield KM, Leon DA. Birthweight and gestational age by ethnic group, England and Wales 2005: introducing new data on births. *Health Stat Q* 2008(39):22-31, 34-55. [published Online First: 2008/09/25]
31. Jardine JE, Frémeaux A, Coe M, et al. Validation of ethnicity in administrative hospital data in women giving birth in England: cohort study. *BMJ Open* 2021;11(8):e051977. doi: 10.1136/bmjopen-2021-051977
32. Gardosi J, Madurasinghe V, Williams M, et al. Maternal and Fetal Risk Factors for Stillbirth: Population Based Study. *BMJ* 2013;346:f108.

- 1  
2  
3 33. Smith LK, Budd JLS, Field DJ, et al. Socioeconomic inequalities in outcome of pregnancy and  
4 neonatal mortality associated with congenital anomalies: population based study. *BMJ*  
5 2011;343:d4306. doi: 10.1136/bmj.d4306  
6  
7 34. Yu J. A systematic review of issues around antenatal screening and prenatal diagnostic  
8 testing for genetic disorders: women of Asian origin in western countries. *Health Soc Care*  
9 *Community* 2012;20(4):329-46. doi: 10.1111/j.1365-2524.2011.01036.x [published Online  
10 First: 2011/11/10]  
11 35. Sheridan E, Wright J, Small N, et al. Risk factors for congenital anomaly in a multiethnic birth  
12 cohort: an analysis of the Born in Bradford study. *Lancet* 2013;382(9901):1350-9. doi:  
13 10.1016/s0140-6736(13)61132-0 [published Online First: 2013/07/09]  
14 36. Reinebrant H, Leisher S, Coory M, et al. Making stillbirths visible: a systematic review of  
15 globally reported causes of stillbirth. *BJOG: An International Journal of Obstetrics &*  
16 *Gynaecology* 2018;125(2):212-24. doi: doi:10.1111/1471-0528.14971  
17 37. Evans MJ, Draper ES, Smith LK. Impact of sociodemographic and clinical factors on offer and  
18 parental consent to postmortem following stillbirth or neonatal death: a UK population-  
19 based cohort study. *Arch Dis Child Fetal Neonatal Ed* 2020;105(5):532-37. doi:  
20 10.1136/archdischild-2019-318226  
21 38. Wojcieszek AM, Reinebrant HE, Leisher SH, et al. Characteristics of a global classification  
22 system for perinatal deaths: a Delphi consensus study. *BMC Pregnancy and Childbirth*  
23 2016;16(1):223. doi: 10.1186/s12884-016-0993-x  
24 39. Flenady V, Frøen JF, Pinar H, et al. An evaluation of classification systems for stillbirth. *BMC*  
25 *Pregnancy and Childbirth* 2009;9(1):24. doi: 10.1186/1471-2393-9-24  
26  
27  
28  
29  
30  
31  
32  
33  
34  
35  
36  
37  
38  
39  
40  
41  
42  
43  
44  
45  
46  
47  
48  
49  
50  
51  
52  
53  
54  
55  
56  
57  
58  
59  
60

Deprivation quintile

1  
2  
3  
4  
5  
6  
7  
8  
9  
10  
11  
12  
13  
14  
15  
16  
17  
18  
19  
20  
21  
22  
23  
24  
25  
26  
27  
28  
29  
30  
31  
32  
33  
34  
35  
36  
37  
38  
39  
40  
41

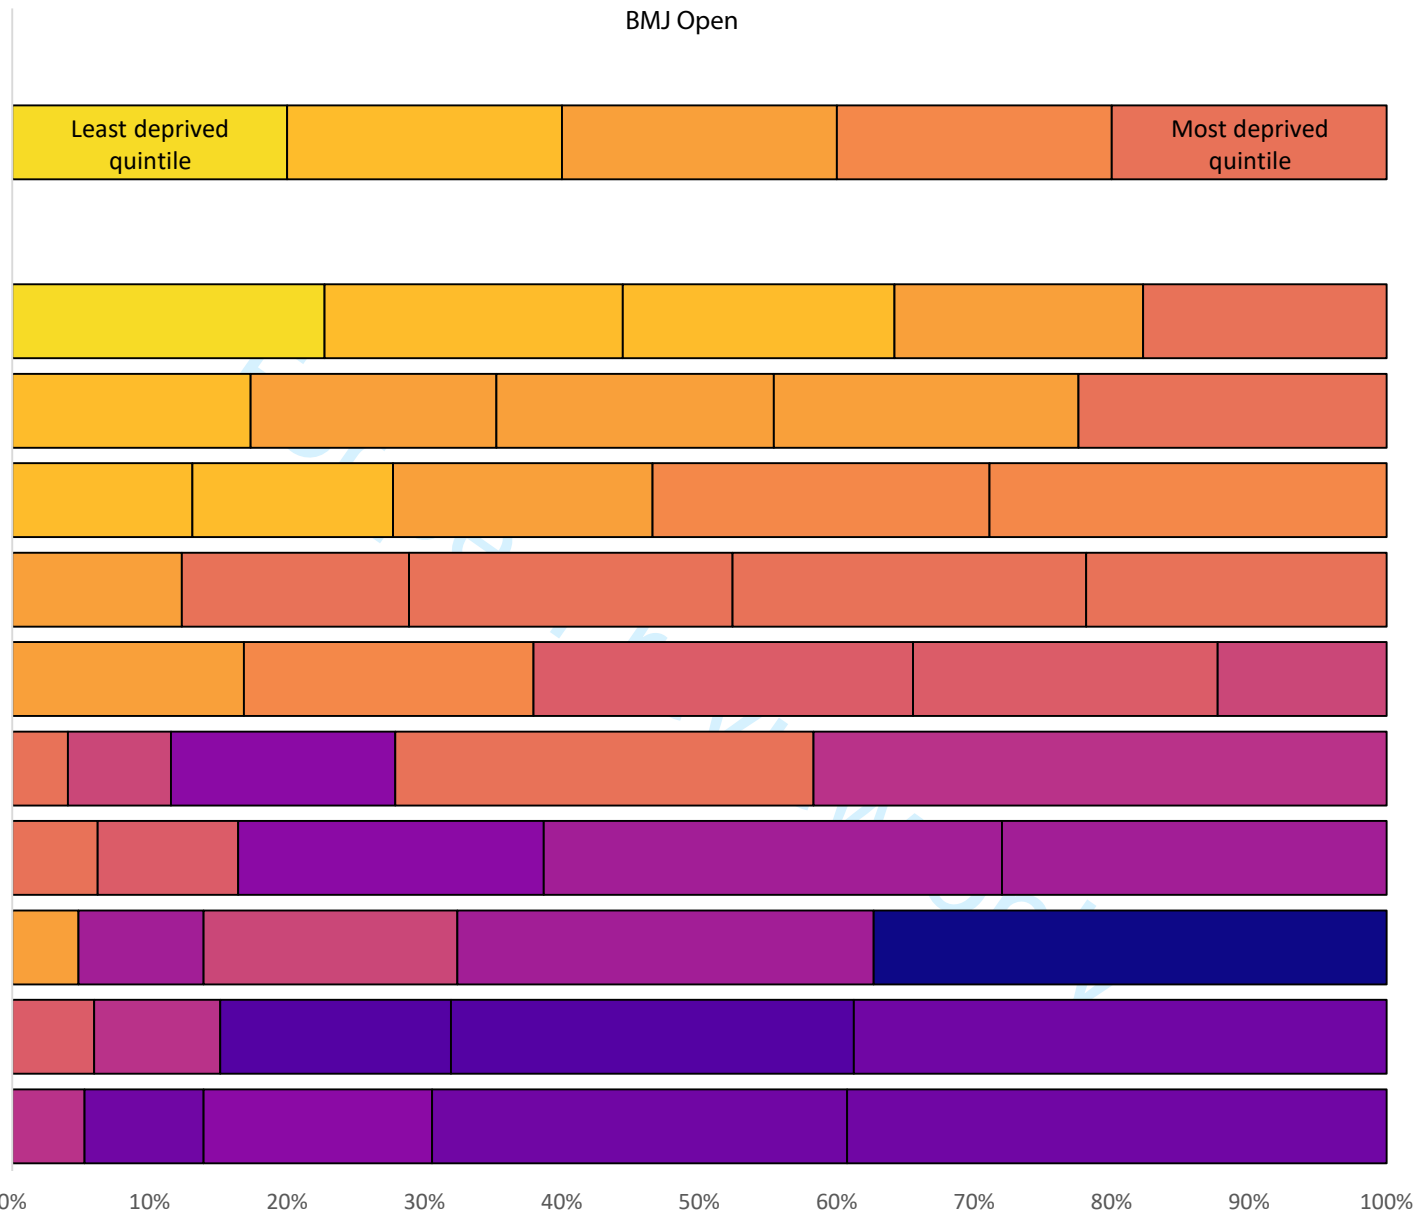

Stillbirth rate per 1000 births

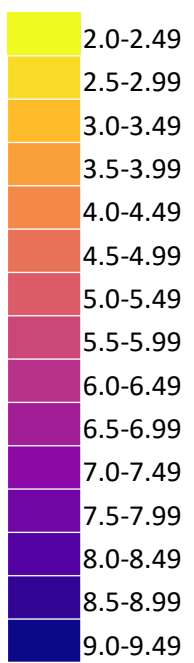

0% 10% 20% 30% 40% 50% 60% 70% 80% 90% 100%

Percentage of births in each deprivation quintile (ethnicity specific)

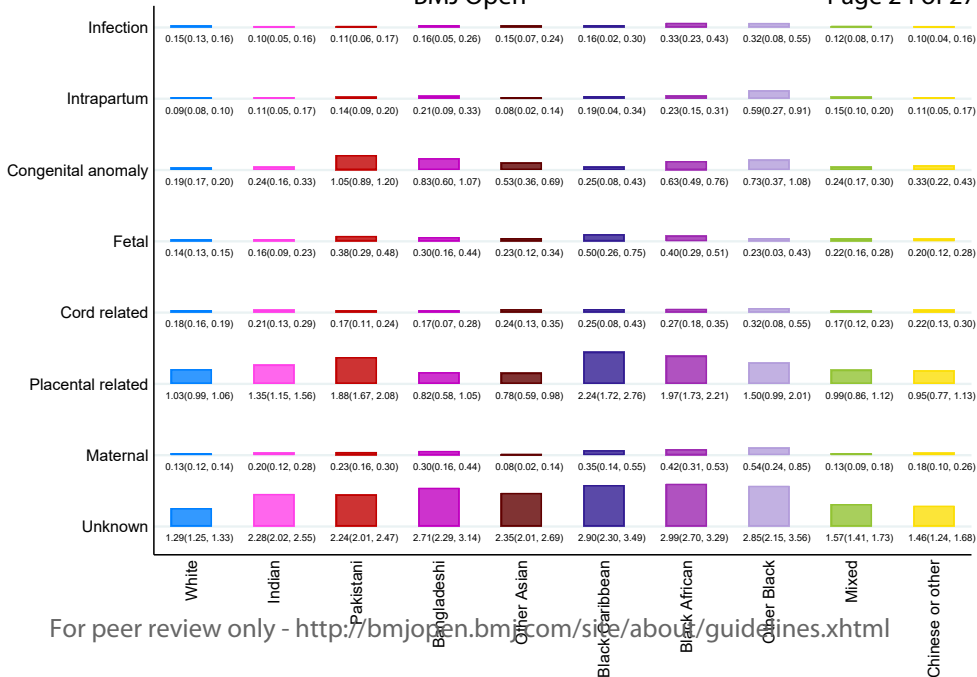

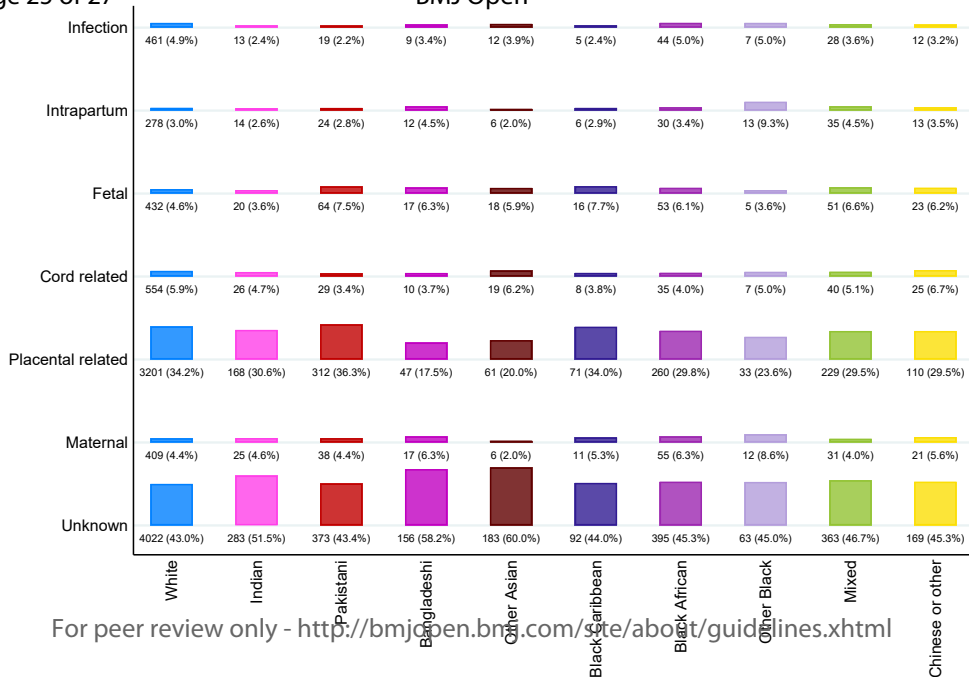

**Table S1: Percentage (number) of births, and stillbirth rate per 1,000 total births (number) by deprivation quintile and baby's ethnicity in the UK: 2014 to 2019 (Numbers used in Figure 1)**

|                         |                        | DEPRIVATION QUINTILE    |                         |                       |                         |                       |                         |                       |                         |                        |                         |
|-------------------------|------------------------|-------------------------|-------------------------|-----------------------|-------------------------|-----------------------|-------------------------|-----------------------|-------------------------|------------------------|-------------------------|
|                         |                        | Least deprived quintile |                         | Quintile 2            |                         | Quintile 3            |                         | Quintile 4            |                         | Most deprived quintile |                         |
|                         |                        | Total births<br>% (n)   | Stillbirths<br>Rate (n) | Total births<br>% (n) | Stillbirths<br>Rate (n) | Total births<br>% (n) | Stillbirths<br>Rate (n) | Total births<br>% (n) | Stillbirths<br>Rate (n) | Total births<br>% (n)  | Stillbirths<br>Rate (n) |
| <b>BABY'S ETHNICITY</b> | <b>White</b>           | 22.72<br>(705,826)      | 2.73<br>(1,924)         | 21.69<br>(673,889)    | 3.00<br>(2,024)         | 19.78<br>(614,513)    | 3.30<br>(2,025)         | 18.09<br>(561,853)    | 3.67<br>(2,061)         | 17.72<br>(550,514)     | 4.60<br>(2,531)         |
|                         | <b>Indian</b>          | 16.86<br>(20,871)       | 3.83<br>(80)            | 21.06<br>(26,081)     | 4.41<br>(115)           | 27.62<br>(34,202)     | 5.32<br>(182)           | 22.18<br>(27,457)     | 5.35<br>(147)           | 12.28<br>(15,207)      | 5.98<br>(91)            |
|                         | <b>Pakistani</b>       | 6.22<br>(10,348)        | 4.74<br>(49)            | 10.21<br>(16,977)     | 5.36<br>(91)            | 22.24<br>(36,975)     | 7.14<br>(264)           | 33.34<br>(55,441)     | 6.93<br>(384)           | 27.99<br>(46,535)      | 6.53<br>(304)           |
|                         | <b>Bangladeshi</b>     | 4.06<br>(2,334)         | 4.71<br>(11)            | 7.5<br>(4,314)        | 5.8<br>(25)             | 16.31<br>(9,381)      | 7.04<br>(66)            | 30.43<br>(17,503)     | 4.91<br>(86)            | 41.70<br>(23,987)      | 6.13<br>(147)           |
|                         | <b>Other Asian</b>     | 12.34<br>(9,607)        | 3.85<br>(37)            | 16.54<br>(12,876)     | 4.82<br>(62)            | 23.53<br>(18,321)     | 4.97<br>(91)            | 25.73<br>(20,035)     | 4.94<br>(99)            | 21.86<br>(17,023)      | 4.52<br>(77)            |
|                         | <b>Black Caribbean</b> | 4.81<br>(1,527)         | 3.93<br>(6)             | 9.11<br>(2,895)       | 6.91<br>(20)            | 18.46<br>(5,864)      | 5.63<br>(33)            | 30.29<br>(9,623)      | 6.96<br>(67)            | 37.33<br>(11,857)      | 9.28<br>(110)           |
|                         | <b>Black African</b>   | 5.25<br>(6,929)         | 6.06<br>(42)            | 8.67<br>(11,435)      | 7.52<br>(86)            | 16.62<br>(21,925)     | 7.34<br>(161)           | 30.21<br>(39,856)     | 7.75<br>(309)           | 39.24<br>(51,768)      | 7.88<br>(408)           |
|                         | <b>Black other</b>     | 5.96<br>(1,315)         | 5.32<br>(7)             | 9.17<br>(2,022)       | 6.43<br>(13)            | 16.79<br>(3,704)      | 8.10<br>(30)            | 29.32<br>(6,467)      | 8.04<br>(52)            | 38.77<br>(8,552)       | 7.37<br>(63)            |
|                         | <b>Mixed</b>           | 17.35<br>(40,155)       | 3.01<br>(121)           | 17.88<br>(41,362)     | 3.72<br>(154)           | 20.19<br>(46,724)     | 3.51<br>(164)           | 22.15<br>(51,264)     | 3.76<br>(193)           | 22.42<br>(51,884)      | 4.59<br>(238)           |
|                         | <b>Other</b>           | 13.11<br>(15,149)       | 3.37<br>(51)            | 14.59<br>(16,859)     | 3.20<br>(54)            | 18.88<br>(21,812)     | 3.53<br>(77)            | 24.52<br>(28,331)     | 4.17<br>(118)           | 28.9<br>(33,387)       | 4.13<br>(138)           |



STROBE Statement—Checklist of items that should be included in reports of *cohort studies*

|                           | Item No | Recommendation                                                                                                                                                                                                                                                                                                         | Page No       |
|---------------------------|---------|------------------------------------------------------------------------------------------------------------------------------------------------------------------------------------------------------------------------------------------------------------------------------------------------------------------------|---------------|
| <b>Title and abstract</b> | 1       | (a) Indicate the study's design with a commonly used term in the title or the abstract<br>(b) Provide in the abstract an informative and balanced summary of what was done and what was found                                                                                                                          | P1 & P2<br>P2 |
| <b>Introduction</b>       |         |                                                                                                                                                                                                                                                                                                                        |               |
| Background/rationale      | 2       | Explain the scientific background and rationale for the investigation being reported                                                                                                                                                                                                                                   | P4            |
| Objectives                | 3       | State specific objectives, including any prespecified hypotheses                                                                                                                                                                                                                                                       | P4            |
| <b>Methods</b>            |         |                                                                                                                                                                                                                                                                                                                        |               |
| Study design              | 4       | Present key elements of study design early in the paper                                                                                                                                                                                                                                                                | P5            |
| Setting                   | 5       | Describe the setting, locations, and relevant dates, including periods of recruitment, exposure, follow-up, and data collection                                                                                                                                                                                        | P5            |
| Participants              | 6       | (a) Give the eligibility criteria, and the sources and methods of selection of participants. Describe methods of follow-up<br>(b) For matched studies, give matching criteria and number of exposed and unexposed                                                                                                      | P5            |
| Variables                 | 7       | Clearly define all outcomes, exposures, predictors, potential confounders, and effect modifiers. Give diagnostic criteria, if applicable                                                                                                                                                                               | P5-6          |
| Data sources/measurement  | 8*      | For each variable of interest, give sources of data and details of methods of assessment (measurement). Describe comparability of assessment methods if there is more than one group                                                                                                                                   | P5-6          |
| Bias                      | 9       | Describe any efforts to address potential sources of bias                                                                                                                                                                                                                                                              | P7            |
| Study size                | 10      | Explain how the study size was arrived at                                                                                                                                                                                                                                                                              | P5            |
| Quantitative variables    | 11      | Explain how quantitative variables were handled in the analyses. If applicable, describe which groupings were chosen and why                                                                                                                                                                                           | P5-7          |
| Statistical methods       | 12      | (a) Describe all statistical methods, including those used to control for confounding<br>(b) Describe any methods used to examine subgroups and interactions<br>(c) Explain how missing data were addressed<br>(d) If applicable, explain how loss to follow-up was addressed<br>(e) Describe any sensitivity analyses | P6-7          |
| <b>Results</b>            |         |                                                                                                                                                                                                                                                                                                                        |               |
| Participants              | 13*     | (a) Report numbers of individuals at each stage of study—eg numbers potentially eligible, examined for eligibility, confirmed eligible, included in the study, completing follow-up, and analysed<br>(b) Give reasons for non-participation at each stage<br>(c) Consider use of a flow diagram                        | P8            |
| Descriptive data          | 14*     | (a) Give characteristics of study participants (eg demographic, clinical, social) and information on exposures and potential confounders<br>(b) Indicate number of participants with missing data for each variable of interest<br>(c) Summarise follow-up time (eg, average and total amount)                         | P8 & Table 1  |
| Outcome data              | 15*     | Report numbers of outcome events or summary measures over time                                                                                                                                                                                                                                                         | Table 1,p9    |

|                                      |                          |    |                                                                                                                                                                                                                                                                                                                                                                                                               |        |
|--------------------------------------|--------------------------|----|---------------------------------------------------------------------------------------------------------------------------------------------------------------------------------------------------------------------------------------------------------------------------------------------------------------------------------------------------------------------------------------------------------------|--------|
| 1<br>2<br>3<br>4<br>5<br>6<br>7<br>8 | Main results             | 16 | (a) Give unadjusted estimates and, if applicable, confounder-adjusted estimates and their precision (eg, 95% confidence interval). Make clear which confounders were adjusted for and why they were included<br>(b) Report category boundaries when continuous variables were categorized<br>(c) If relevant, consider translating estimates of relative risk into absolute risk for a meaningful time period | P10-11 |
| 9<br>10<br>11                        | Other analyses           | 17 | Report other analyses done—eg analyses of subgroups and interactions, and sensitivity analyses                                                                                                                                                                                                                                                                                                                | P12-13 |
| 12                                   | <b>Discussion</b>        |    |                                                                                                                                                                                                                                                                                                                                                                                                               |        |
| 13                                   | Key results              | 18 | Summarise key results with reference to study objectives                                                                                                                                                                                                                                                                                                                                                      | P14    |
| 14<br>15<br>16                       | Limitations              | 19 | Discuss limitations of the study, taking into account sources of potential bias or imprecision. Discuss both direction and magnitude of any potential bias                                                                                                                                                                                                                                                    | P14-15 |
| 17<br>18                             | Interpretation           | 20 | Give a cautious overall interpretation of results considering objectives, limitations, multiplicity of analyses, results from similar studies, and other relevant evidence                                                                                                                                                                                                                                    | P15    |
| 19<br>20                             | Generalisability         | 21 | Discuss the generalisability (external validity) of the study results                                                                                                                                                                                                                                                                                                                                         | P14    |
| 21                                   | <b>Other information</b> |    |                                                                                                                                                                                                                                                                                                                                                                                                               |        |
| 22<br>23<br>24                       | Funding                  | 22 | Give the source of funding and the role of the funders for the present study and, if applicable, for the original study on which the present article is based                                                                                                                                                                                                                                                 | P17    |

\*Give information separately for exposed and unexposed groups.

**Note:** An Explanation and Elaboration article discusses each checklist item and gives methodological background and published examples of transparent reporting. The STROBE checklist is best used in conjunction with this article (freely available on the Web sites of PLoS Medicine at <http://www.plosmedicine.org/>, Annals of Internal Medicine at <http://www.annals.org/>, and Epidemiology at <http://www.epidem.com/>). Information on the STROBE Initiative is available at <http://www.strobe-statement.org>.
