# Supplementary material for: Understanding ethnic inequalities in stillbirth rates: a UK population-based cohort study
Source: PubMed Central journal article supplement — BMJ Open. 2022 Jan 24;12(2):e057412. doi: 10.1136/bmjopen-2021-057412 (PMC8968514; doi:10.1136/bmjopen-2021-057412), 2022-01-24
Supplement: bmjopen-2021-057412supp001.pdf [file bmjopen-2021-057412supp001.pdf]

**Table S1: Percentage (number) of births, and stillbirth rate per 1,000 total births (number) by deprivation quintile and baby's ethnicity in the UK: 2014 to 2019 (Numbers used in Figure 1)**

|                         |                        | DEPRIVATION QUINTILE    |                         |                       |                         |                       |                         |                       |                         |                        |                         |
|-------------------------|------------------------|-------------------------|-------------------------|-----------------------|-------------------------|-----------------------|-------------------------|-----------------------|-------------------------|------------------------|-------------------------|
|                         |                        | Least deprived quintile |                         | Quintile 2            |                         | Quintile3             |                         | Quintile 4            |                         | Most deprived quintile |                         |
|                         |                        | Total births<br>% (n)   | Stillbirths<br>Rate (n) | Total births<br>% (n) | Stillbirths<br>Rate (n) | Total births<br>% (n) | Stillbirths<br>Rate (n) | Total births<br>% (n) | Stillbirths<br>Rate (n) | Total births<br>% (n)  | Stillbirths<br>Rate (n) |
| <b>BABY'S ETHNICITY</b> | <b>White</b>           | 22.72<br>(705,826)      | 2.73<br>(1,924)         | 21.69<br>(673,889)    | 3.00<br>(2,024)         | 19.78<br>(614,513)    | 3.30<br>(2,025)         | 18.09<br>(561,853)    | 3.67<br>(2,061)         | 17.72<br>(550,514)     | 4.60<br>(2,531)         |
|                         | <b>Indian</b>          | 16.86<br>(20,871)       | 3.83<br>(80)            | 21.06<br>(26,081)     | 4.41<br>(115)           | 27.62<br>(34,202)     | 5.32<br>(182)           | 22.18<br>(27,457)     | 5.35<br>(147)           | 12.28<br>(15,207)      | 5.98<br>(91)            |
|                         | <b>Pakistani</b>       | 6.22<br>(10,348)        | 4.74<br>(49)            | 10.21<br>(16,977)     | 5.36<br>(91)            | 22.24<br>(36,975)     | 7.14<br>(264)           | 33.34<br>(55,441)     | 6.93<br>(384)           | 27.99<br>(46,535)      | 6.53<br>(304)           |
|                         | <b>Bangladeshi</b>     | 4.06<br>(2,334)         | 4.71<br>(11)            | 7.5<br>(4,314)        | 5.8<br>(25)             | 16.31<br>(9,381)      | 7.04<br>(66)            | 30.43<br>(17,503)     | 4.91<br>(86)            | 41.70<br>(23,987)      | 6.13<br>(147)           |
|                         | <b>Other Asian</b>     | 12.34<br>(9,607)        | 3.85<br>(37)            | 16.54<br>(12,876)     | 4.82<br>(62)            | 23.53<br>(18,321)     | 4.97<br>(91)            | 25.73<br>(20,035)     | 4.94<br>(99)            | 21.86<br>(17,023)      | 4.52<br>(77)            |
|                         | <b>Black Caribbean</b> | 4.81<br>(1,527)         | 3.93<br>(6)             | 9.11<br>(2,895)       | 6.91<br>(20)            | 18.46<br>(5,864)      | 5.63<br>(33)            | 30.29<br>(9,623)      | 6.96<br>(67)            | 37.33<br>(11,857)      | 9.28<br>(110)           |
|                         | <b>Black African</b>   | 5.25<br>(6,929)         | 6.06<br>(42)            | 8.67<br>(11,435)      | 7.52<br>(86)            | 16.62<br>(21,925)     | 7.34<br>(161)           | 30.21<br>(39,856)     | 7.75<br>(309)           | 39.24<br>(51,768)      | 7.88<br>(408)           |
|                         | <b>Black other</b>     | 5.96<br>(1,315)         | 5.32<br>(7)             | 9.17<br>(2,022)       | 6.43<br>(13)            | 16.79<br>(3,704)      | 8.10<br>(30)            | 29.32<br>(6,467)      | 8.04<br>(52)            | 38.77<br>(8,552)       | 7.37<br>(63)            |
|                         | <b>Mixed</b>           | 17.35<br>(40,155)       | 3.01<br>(121)           | 17.88<br>(41,362)     | 3.72<br>(154)           | 20.19<br>(46,724)     | 3.51<br>(164)           | 22.15<br>(51,264)     | 3.76<br>(193)           | 22.42<br>(51,884)      | 4.59<br>(238)           |
|                         | <b>Other</b>           | 13.11<br>(15,149)       | 3.37<br>(51)            | 14.59<br>(16,859)     | 3.20<br>(54)            | 18.88<br>(21,812)     | 3.53<br>(77)            | 24.52<br>(28,331)     | 4.17<br>(118)           | 28.9<br>(33,387)       | 4.13<br>(138)           |
